1 **Impact of suboptimal APOBEC3G neutralization on the**  
2 **emergence of HIV drug resistance in humanized mice**

3  
4 **Matthew M. Hernandez<sup>1,2\*</sup>, Audrey Fahrny<sup>3\*</sup>, Anitha Jayaprakash<sup>4#</sup>, Gustavo Gers-**  
5 **Huber<sup>3</sup>, Marsha Dillon-White<sup>2</sup>, Annette Audigé<sup>3</sup>, Lubbertus C.F. Mulder<sup>2,5</sup>, Ravi**  
6 **Sachidanandam<sup>4,\$</sup>, Roberto F. Speck<sup>3,\$</sup>, Viviana Simon<sup>2,5,6,\$</sup>**

7  
8 <sup>1</sup> The Graduate School of Biomedical Sciences, Icahn School of Medicine at Mount Sinai,  
9 New York, NY, USA

10 <sup>2</sup> Department of Microbiology, Icahn School of Medicine at Mount Sinai, New York, NY, USA

11 <sup>3</sup> Division of Infectious Diseases and Hospital Epidemiology, University Hospital of Zurich,  
12 University of Zurich, Zurich, Switzerland

13 <sup>4</sup> Department of Oncological Sciences, Icahn School of Medicine at Mount Sinai, New York,  
14 NY, USA

15 <sup>5</sup> Global Health and Emerging Pathogens Institute, Icahn School of Medicine at Mount Sinai,  
16 New York, NY, USA

17 <sup>6</sup> Division of Infectious Diseases, Department of Medicine, Icahn School of Medicine at  
18 Mount Sinai, New York, NY, USA

19  
20 \* contributed equally

21  
22  
23 Current affiliations/address:

24 # Garihlet, Inc. 355 30th Street, Oakland, CA-94609; [www.garihlet.com](http://www.garihlet.com)

29 Corresponding authors (shared, \$):

30 Dr. Viviana Simon

31 Department of Microbiology

32 Icahn School of Medicine at Mount Sinai

33 Email: [viviana.simon@mssm.edu](mailto:viviana.simon@mssm.edu)

34

35 Dr. Roberto F. Speck,

36 Division of Infectious Diseases and Hospital Epidemiology,

37 University Hospital of Zurich

38 e-mail: [roberto.speck@usz.ch](mailto:roberto.speck@usz.ch)

39

40 Dr. Ravi Sachidanandam,

41 Department of Oncological Sciences

42 Icahn School of Medicine at Mount Sinai

43 e-mail: [ravi.sachidanandam@mssm.edu](mailto:ravi.sachidanandam@mssm.edu)

44

45

46

47 **ABSTRACT**

48 HIV diversification facilitates immune escape and complicates antiretroviral therapy.  
49 In this study, we take advantage of a humanized mouse model to probe the contribution of  
50 APOBEC3 mutagenesis to viral evolution. Humanized mice were infected with isogenic HIV  
51 molecular clones (HIV-WT, HIV-45G, HIV- $\Delta$ SLQ) that differ only in their ability to counteract  
52 APOBEC3G (A3G). Infected mice remained naïve or were treated with the RT inhibitor  
53 lamivudine (3TC). Viremia, emergence of drug resistant variants and quasispecies  
54 diversification in the plasma compartment were determined throughout infection. While both  
55 HIV-WT and HIV-45G achieved robust infection, over time HIV-45G replication was  
56 significantly reduced compared to HIV-WT in the absence of 3TC treatment. In contrast,  
57 treatment response differed significantly between HIV-45G and HIV-WT infected mice.  
58 Antiretroviral treatment failed in 91% of HIV-45G infected mice while only 36% of HIV-WT  
59 infected mice displayed a similar negative outcome. Emergence of 3TC resistant variants  
60 and nucleotide diversity were determined by analyzing 155,462 single HIV reverse  
61 transcriptase (*RT*) and 6,985 *vif* sequences from 33 mice. Prior to treatment, variants with  
62 genotypic 3TC resistance (RT-M184I/V) were detected at low levels in over a third of all  
63 animals. Upon treatment, the composition of the plasma quasispecies rapidly changed  
64 leading to a majority of circulating viral variants encoding RT-184I. Interestingly, increased  
65 viral diversity prior to treatment initiation correlated with higher plasma viremia in HIV-45G  
66 but not in HIV-WT infected animals. Taken together, HIV variants with suboptimal anti-A3G  
67 activity were attenuated in the absence of selection but display a fitness advantage in the  
68 presence of antiretroviral treatment.

69

70 **IMPORTANCE**

71 Both viral (e.g., reverse transcriptase, *RT*) and host factors (e.g., APOBEC3G  
72 (A3G)) can contribute to HIV sequence diversity. This study shows that suboptimal anti-  
73 A3G activity shapes viral fitness and drives viral evolution in the plasma compartment of  
74 humanized mice.

75

## 76 INTRODUCTION

77 HIV diversity is extensive on both an individual level and a global level. It drives viral  
78 adaptation in distinct cellular environments and facilitates escape from immune surveillance  
79 and antiretroviral therapy (ART,(1)). A combination of HIV features including high *in vivo*  
80 mutation rate, high replication rate and recombination between co-packaged genomes  
81 contribute to viral diversification (2, 3). Although the high mutation rate is caused by the  
82 error-prone nature of the HIV reverse transcriptase (*RT*, (4, 5)), the mutagenesis by host  
83 apolipoprotein B mRNA editing enzyme, catalytic polypeptide-like 3 (APOBEC3) cytidine  
84 deaminases also contributes to diversity (6-8). Several of the APOBEC3 family members  
85 limit HIV replication if left unchecked by HIV Vif, by mutating the viral cDNA during reverse  
86 transcription introducing guanosine to adenosine (G-to-A) substitutions in HIV provirus (9-  
87 13). Counteraction of APOBEC3G (A3G), APOBEC3F (A3F) and the stable haplotypes of  
88 APOBEC3H (A3H) by HIV Vif is essential for establishing a robust infection *in vivo*  
89 (reviewed in (10, 14)). However, proviruses in HIV infected patients frequently display high  
90 numbers of G-to-A mutations in dinucleotide contexts suggesting previous suboptimal anti-  
91 APOBEC3 activity (15-17). In fact, HIV Vif alleles obtained from the plasma and/or  
92 peripheral blood cell compartment of patients differ – to some extent – in their ability to  
93 counteract the different APOBEC3 proteins (18-20).

94 Our understanding of the impact of HIV Vif variation on HIV/AIDS disease outcomes  
95 remains incomplete since such studies in patients are inherently limited in scope and  
96 descriptive in nature (11, 21, 22). With the advent of the humanized mouse model in the  
97 past decade, *in vivo* studies investigating HIV pathogenesis (23-25), novel therapeutic  
98 interventions (26-29) and viral evolution (30-32) under controlled experimental conditions  
99 have become possible. Experiments in different humanized mice systems (e.g., NOG, NSG,  
100 BLT) established that HIV Vif is necessary for infection (33, 34). Moreover, the impact of  
101 A3F, A3G and A3H on replication has been tested using HIV Vif mutant viruses that are  
102 defective in counteracting A3D, A3F, A3G or A3H (35-37). These studies show that the  
103 failure to neutralize A3G results in severe attenuation of viral replication with viruses unable  
104 to counteract A3G being less diverse than their wild-type counterparts (35, 36). Thus,  
105 interrogation of A3G-driven HIV diversification in an “all or nothing” fashion indicates that a  
106 complete loss of anti-A3G activity results in HIV restriction and limits viral diversification.

107            However, most circulating HIV strains maintain some activity against A3G such that  
108 experiments with viruses with suboptimal anti-A3G activity may provide a more relevant  
109 picture regarding the effects of partial APOBEC3 neutralization. Moreover, we reasoned  
110 that to directly test to what extent variation in APOBEC3 neutralization capacity influences  
111 HIV evolution *in vivo*, one needs to perturbate not only the HIV Vif-A3G axis (e.g., by using  
112 HIV Vif mutants) but also the viral equilibrium reached upon establishment of infection (e.g.,  
113 by administrating an antiretroviral to apply selection pressure). Thus, in this study, we  
114 infected humanized mice with wild-type and selected Vif mutant viruses and monitored  
115 infection in the plasma compartment over time in the presence and absence of antiretroviral  
116 treatment in the form of 3TC monotherapy. We assessed viral replication by longitudinally  
117 quantifying plasma viremia as well as viral diversification using a high-resolution, molecular  
118 ID tag based deep sequencing approach. Our data indicate that suboptimal neutralization  
119 of A3G results in attenuated viral replication in the absence of selection but provides a  
120 replication advantage in the presence of 3TC antiretroviral treatment.

121

## 122 **MATERIALS AND METHODS**

### 123 **Ethics statement**

124 Animal experiments were approved by the Cantonal Veterinary Office (#26/2011 &  
125 #93/2014) and performed in accordance to local guidelines and to the Swiss animal  
126 protection law. The Ethical Committee of the University of Zurich approved the procurement  
127 of human cord blood and written informed consent was provided prior to the collection of  
128 cord blood.

### 129 **Cell-lines**

130 HEK293T cells were obtained from ATCC (CRL-3216) and TZM-bl reporter cells were  
131 obtained from the AIDS Research and Reference Reagent Program, Division of AIDS,  
132 NIAID, National Institutes of Health (NIH AIDS Reagent Program, cat. 8129) (38-42). HEK  
133 293T cells and TZM-bl reporter cells were maintained in Dulbecco's modified Eagle medium  
134 (DMEM, Fisher Scientific, cat. MT10-013-CV) supplemented with 10% fetal bovine serum  
135 (FBS) (Gemini Bio-Products) and 100 U/mL penicillin-streptomycin (Fisher Scientific, cat.  
136 MT30002C1). HEK 293T and TZM-bl cells were grown on 100mm Falcon™ Standard Tissue  
137 Culture Dishes (Fisher Scientific, cat. 08-772E).

### 138 **Generation of viral stocks**

139 Isogenic molecular clones were derived from pNL4-3 (HIV-WT; NIH AIDS Reagent  
140 Program, cat. 114) (43), Replication competent molecular clones encoding Vif mutants  
141 E45G (HIV-45G) and SLQ144AAA (HIV-ΔSLQ) were generated as previously described  
142 (44). Viral stocks were generated by transfecting HEK293T cells using 4µg/mL  
143 polyethylenimine (PEI, Polysciences Inc., cat. 23966). Culture supernatants were collected  
144 48 hours post-transfection, filtered and frozen at -80°C until further use. Viral stock  
145 concentrations were quantitated using an in-house p24 ELISA (45) and/or tittered on TZM-  
146 bl reporter cells as previously described (44).

### 147 **Generation of humanized mice**

148 Animals were housed under specific pathogen free conditions. Humanized mice were  
149 generated as previously described (29). Briefly, newborn immunodeficient NOD-scid IL-  
150 2Rγ-null (NSG) mice (Jackson laboratory, Bar Harbor, ME) were irradiated 1-3 days after  
151 birth with 1 Gy and transplanted intrahepatically with approximately  $2.0 \pm 0.5 \times 10^5$  cord blood-

152 derived CD34+ cells. Between 2 and 6 mice were transplanted with cells from the same  
153 donor. A total of 12 donors were used for the three infection experiments.

154 Twelve to sixteen weeks after transplantation, human engraftment and *de novo* human  
155 immune system reconstitution in the mice were assessed by staining peripheral blood with  
156 monoclonal antibodies against the panhuman marker CD45 (Beckman Coulter, cat.  
157 B36294), CD19 (Biolegend, cat. 302212), CD3 (Biolegend, cat. 300308), CD4 (Biolegend,  
158 cat. 300518) and CD8 (Biolegend, cat. 301035). Flow-cytometry analyses were performed  
159 on a CyAN™ ADP Analyzer (Beckman Coulter, Brea, CA).

#### 160 **Infection and antiretroviral treatment of humanized mice**

161 Mice were infected intraperitoneally with  $2 \times 10^5$  TCID<sub>50</sub> per mouse of each of the 3 HIV  
162 clones in 200 μL volume. Plasma viremia was measured using Cobas® Amplicor technology  
163 (Roche, Switzerland) at the described time points throughout the infection. The detection  
164 limit of the assay is 400 HIV RNA copies/mL.

165 Lamivudine (3TC Epivir, GlaxoSmithKlein, UK) treatment was started 30 days post infection  
166 in the treatment group of the infected mice. 3TC tablets were weighed, pulverized and  
167 combined with food pellets as previously described (29).

#### 168 **Amplification of HIV from plasma viral RNA**

169 Viral RNA was extracted from 140 μL frozen plasma using the QIAamp Viral RNA Minikit  
170 (QIAGEN, cat. 52904) as per manufacturer's instruction.

171 For deep sequencing, cDNAs were synthesized using custom reverse transcription  
172 primers.(Supplemental Table 1; Integrated DNA Technologies). From 5' to 3', our first  
173 generation *RT* cDNA primer (4372) included a 16 basepair (bp) HIV-specific sequence  
174 (accession: AF324493.2: 3336-3351), 8 bp randomized sequence (unique molecular ID  
175 (UMID)) and an additional 23 bp HIV-specific sequence (AF324493.2: 3305-3327). Viral  
176 cDNA was synthesized using the Invitrogen™ ThermoScript RT-PCR System (Thermo  
177 Fisher Scientific, cat. 11146016). Briefly, RNA and primer were denatured at 65°C for 5 min.  
178 ThermoScript reaction mix was added to the RNA and primer and incubated at 50°C for 60  
179 min, followed by an inactivation step of 85°C for 5 min.

180 Viral cDNA was column purified (Zymo Clean and Concentrator kit, cat. D4034) and  
181 amplified in a first round PCR using primers 1922 (AF324493.2: 2929-2946) and 1923

182 (AF324493.2: 3337-3356). First round PCR used Pfx50 polymerase (94°C for 2 min,  
183 followed by 23 cycles of 93°C for 15 sec, 48°C for 30 sec, 68°C for 60 sec and a final  
184 extension of 68°C for 10 min) (Thermo Fisher Scientific, cat. 12355012). First round  
185 products were purified (Zymo Clean and Concentrator) and a second PCR was performed  
186 to add Illumina-based adapters using custom primers 1690 and one of 73 primers with  
187 distinct MiSeq barcode identifiers (Supplemental Table 1). The second round PCR used  
188 PfuUltra II Fusion HS Polymerase (95°C for 2 min, followed by 25 cycles of 93°C for 20 sec,  
189 50°C for 20 sec, 72°C for 15 sec and a final extension of 72°C for 10 min) (Agilent  
190 Technologies, cat. 600672). Second round PCR products were confirmed by  
191 electrophoresis and purified by SPRIselect magnetic bead selection (Beckman Coulter, cat.  
192 B23317).

193 To amplify *vif* sequences from plasma vRNA, a *vif* specific cDNA synthesis primer was used  
194 (4373). From 5' to 3', primer 4373 included a 16 bp T7 sequence, an 8 bp randomized  
195 sequence and 23 bp HIV-specific sequence (AF324493.2: 5386-5406). Viral cDNA was  
196 synthesized using the ThermoScript RT-PCR System and purified as described above.  
197 cDNAs were amplified in the first round PCR using primers 2402 (AF324493.2: 4993-5012)  
198 and 2401 (T7). First round products were purified and amplified in a second round PCR  
199 using primers 2403 and one of 80 primers with distinct MiSeq barcode identifiers and  
200 complementarity to the T7 sequence. PCR cycling conditions were the same as used for  
201 the *RT* products.

## 202 **MiSeq Library Preparation and MiSeq Instrumentation**

203 Sequencing libraries were run on the Illumina MiSeq to sequence paired-end reads. To  
204 prepare libraries, bead-purified PCR products containing Illumina adapters (376 bp *RT*  
205 amplicons and 393 bp *vif* amplicons) were quantitated by Qubit dsDNA HS Assay Kit  
206 (Thermo Fisher Scientific, cat. Q32854). To sequence 250 bp of the *RT* region, a 6pM final  
207 library was run with a 20% spike-in of PhiX Control V3 (Illumina, cat. FC-110-3001) for  
208 2x150 cycles using MiSeq Reagent Kit v2 (300 cycles, Illumina, cat. MS-102-2002) or  
209 MiSeq Reagent Kit v3 (600 cycles, Illumina, cat. MS-102-3003). Custom sequencing  
210 primers were used for the forward (1692), index (3890), and reverse (3889) reads. To  
211 sequence a 269 basepair long region of *vif*, a 6pM final library was run with a 15% spike-in  
212 of PhiX Control V3 for 2x150 cycles. Custom sequencing primers were used for the forward  
213 (4580), index (4577) and reverse (4578) reads (Supplemental Table 1).



## 214 **Bioinformatic Pipeline for Sequence Analyses**

215 Custom Unix and Perl scripts were written to process FASTQ files. First, paired-end reads  
216 were merged using Paired-End reAd mergeR (46). Reads were aligned to pNL4-3 *RT* or *vif*  
217 reference sequences (AF324493.2) and filtered. Sequences were grouped by distinct  
218 UMIDs. A minimum of three high quality merged pair-end reads contained the same UMID  
219 were required to generate a consensus sequence. Consensus sequences were defined as  
220 sequences where each nucleotide reflected 70% or more of all nucleotides sequenced for  
221 that given position. Consensus sequences for sequences defined by a distinct UMID were  
222 identified using in-house scripts. Twenty-five UMIDs that differed by only one mismatch  
223 from the HIV template sequence were considered to be experimental artifacts and excluded  
224 from the analyses.

225 Additional custom scripts were written to identify 3TC resistance mutations at *RT* codon 184  
226 and to compute overall mutation rates, GG-to-GA as well as GA-to-AA mutagenesis and  
227 the frequency of stop codons within the sequenced *RT* and *vif* regions. DNASP v5  
228 polymorphism software was used to calculate the nucleotide diversity ( $\pi$ ), defined as the  
229 average pair-wise number of nucleotide differences per site in all possible pairs of  
230 consensus sequences per sample (47).

## 231 **Statistics**

232 Normality was assessed using the D'Agostino and Pearson test for numerical data such as  
233 baseline plasma viremia, changes in viremia, proportions of 3TC susceptible/resistant viral  
234 sequences, nucleotide diversity, and mutation rates. If groups passed normality tests,  
235 parametric student's t-test for unpaired data or paired student's t-test for paired data were  
236 used. Otherwise, non-parametric Mann-Whitney or Wilcoxon matched pairs signed-rank  
237 tests were used. For categorical data (e.g., treatment failure/success), Fisher's exact test  
238 was used. Linear regression models were used for replication kinetics and F-tests were  
239 used to compare slopes of curves of best fit. Finally, nonlinear regression methods  
240 (exponential (Malthusian)) using weighted least squares were used with extra sum-of-  
241 squares F-test to compare nonlinear curves of best fit.

242 Significance testing is reported as exact p-values in the text or using asterisks (\*,  $p \leq 0.05$ ;  
243 \*\*,  $p \leq 0.01$ ; \*\*\*,  $p \leq 0.001$ ; \*\*\*\*,  $p \leq 0.0001$ ). All statistics were performed using the built-in  
244 analysis packages from GraphPad Prism v7.0 Suite (GraphPad Software, Inc, La Jolla, CA).

245 **Data availability**

246 All processed FASTA sequencing files are publicly available (will be released upon  
247 publication). In addition, in-house codes for sequence read processing can be accessed at  
248 <https://github.com/AceM1188/Vif-pipeline>.

## 249 RESULTS

### 250 HIV-WT and HIV-45G establish productive infection in the humanized mouse model 251 system.

252 We performed three independent long-term infection experiments in 48 humanized  
253 NSG (hu-NSG) mice mimicking natural infection (Exp. 1; 85 days follow-up post infection)  
254 or treatment interventions (Exp. 2 and Exp. 3; 58-75 days of follow up post infection). **Fig.**  
255 **1A** depicts the time line for each experiment including the viruses used for infection and the  
256 time points at which blood samples were collected for further analysis (e.g., plasma viremia,  
257 HIV RNA sequence analysis).

258 The three viruses selected for these experiments (HIV-WT, HIV-45G and HIV-  
259  $\Delta$ SLQ) consist of isogenic clones of the HIV NL4-3 isolate that differ only in their ability to  
260 counteract A3G. These mutants have been well characterized previously by us and others  
261 (12, 18, 44). Briefly, NL4-3 serves as HIV-WT. NL4-3 Vif counteracts A3G, A3F and A3D  
262 but is inactive against the stable A3H haplotypes (48). HIV- $\Delta$ SLQ fails to bind Cullin5 E3  
263 ligase complex due to three alanines in place of the SLQ BC-box motif (144-146) and,  
264 therefore, fails to counteract any of the APOBEC3 proteins. HIV-45G carries a single point  
265 mutation in codon 45 of Vif (HIV-45G) (18, 44, 49). This mutation in Vif results in attenuation  
266 but not complete abrogation of its activity against A3G while preserving activity against A3F  
267 and A3D (18). Importantly, residue 45 of Vif has not been associated with other Vif functions  
268 and is not involved in any other viral gene products (50, 51). HIV-WT and HIV-45G replicate  
269 to comparable levels in primary human peripheral mononuclear cells while HIV- $\Delta$ SLQ fails  
270 to initiate a spreading infection in cell culture (44). Importantly, suboptimal neutralization of  
271 A3G by HIV-45G does not result in a sizeable replication defect in short-term cell culture  
272 infection experiments making it very well suited for *in vivo* infection experiments aimed at  
273 studying evolution in humanized mice.

274 Hu-NSG mice were reconstituted with CD34+ cells isolated from umbilical cord  
275 blood and immune reconstitution was confirmed after 90 days prior to infection. In all three  
276 experiments, we measured viremia at Day 30 post infection. Infection with HIV-WT and HIV-  
277 45G established comparable average viremia with no significant difference between the  
278 three independent infection experiments (**Fig. 1B**). In good agreement with previous  
279 findings, a functional HIV Vif was necessary to establish a productive infection since all four

280 hu-NSG mice infected with HIV- $\Delta$ SLQ displayed no detectable plasma viremia at Day 30  
281 post infection (**Fig. 1B**).

282

### 283 **Replication of HIV-45G but not HIV-WT is attenuated over time in humanized mice**

284 In the natural infection experiment (Exp. 1), we followed viral replication in the  
285 plasma compartment for nearly three months post infection. Plasma viremia was measured  
286 using molecular diagnostics at regular intervals. All productively infected animals (HIV-WT,  
287 N=14; HIV-45G, N=8) maintained viremia above the limit of detection until the end of the  
288 experiment. HIV- $\Delta$ SLQ infected animals never displayed viral load measurements above  
289 400 copies/ml (limit of detection of the assay). The change in plasma viremia over time is  
290 plotted in **Fig. 2A**. While HIV-WT infection resulted in an increase of replication over time in  
291 all but two animals, HIV-45G replication was attenuated in the majority of infected animals  
292 within 40-60 days post infection. The change in plasma viremia between baseline (i.e., Day  
293 30 post infection) and endpoint was significantly different between the two viruses (HIV-  
294 45G: 0.77 log<sub>10</sub> decrease versus HIV-WT 0.43 log<sub>10</sub> increase; p=0.0026). Taken together,  
295 *in-vivo* HIV-45G replication appears to be attenuated, although this trait becomes apparent  
296 only 50-60 days post infection.

297

### 298 **Suboptimal neutralization of A3G confers superior viral fitness in the presence of** 299 **3TC in the humanized mouse model system.**

300 In the treatment intervention infection experiments (Exp. 2 and Exp. 3), animals  
301 robustly infected with either HIV-WT (N=11) or HIV-45G (N=11) were treated with 3TC  
302 starting at Day 30 post infection until the end of infection (e.g., Day 75 in Exp. 2 and Day  
303 58 in Exp. 3). Of note, the blood collection intervals in Exp. 3 were shorter than in  
304 Experiment 2 (4-7 day versus 14 day intervals).

305 The initial virological response upon 3TC initiation was comparable between the two  
306 groups. Within the first two weeks of 3TC treatment both HIV-WT and HIV-45G viremia  
307 decreased to comparable nadirs (0.69 log<sub>10</sub> versus 0.66 log<sub>10</sub>, respectively) (**Fig. 2C**). One  
308 mouse (#120, infected with HIV-45G) was euthanized at Day 44 post infection as per animal  
309 safety protocol due to signs of wasting. Considering the overall change from baseline to  
310 experiment termination, HIV-WT replication decreased by 0.55 log<sub>10</sub> in the presence of 3TC,

311 whereas HIV-45G viremia had *increased* by 0.25 log<sub>10</sub> from baseline (p=0.0045) (**Fig. 2D**).  
312 Moreover, HIV-45G infected animals experienced a larger (0.99 log<sub>10</sub> vs. 0.52 log<sub>10</sub>,  
313 p=0.0068, **Fig. 2E**) and faster (0.061 vs. 0.033 log<sub>10</sub>/day, p=0.0052, **Fig. 2F**) viral rebound  
314 from the initial lowest points reached upon 3TC treatment initiation.

315 We also assessed 3TC treatment outcomes in a qualitative manner (e.g., treatment  
316 success versus failure, with success being defined as sustained reduction in viremia with  
317 less than 0.5 log<sub>10</sub> rebound from the lowest points). Antiviral treatment was successful in  
318 64% of HIV-WT infected mice but only 9% of HIV-45G infected mice (**Fig. 2G**). Thus, HIV-  
319 45G infected mice had a significantly higher risk of failing treatment (RR: 7.000; 95% CI  
320 1.482 – 40.54; p=0.0237).

321 Taken together, the replication of HIV-45G in the absence (Exp. 1) and in the  
322 presence of 3TC (Exp. 2 and Exp. 3) was very different (compare Figs. **2B** and **2D**). While  
323 the fitness of HIV-45G was attenuated over time in naïve animals, its replication was  
324 significantly less affected by 3TC than that of HIV WT suggesting the existence of a  
325 selection advantage.

326

### 327 **Dynamics of genotypic 3TC drug resistance**

328 The molecular mechanisms resulting in 3TC resistance are well described (52-58).  
329 Single point mutations in codon 184 of HIV *RT* emerge rapidly upon 3TC treatment both *in*  
330 *vivo* and in cell culture. RT-184I (ATG->ATA) and RT-184V (ATG->GTG) are the most  
331 common substitutions observed in HIV infected patients failing 3TC-containing ART (59)  
332 (**Fig. 3A**). These substitutions confer up to >1,000-fold reduced susceptibility to 3TC (53,  
333 58). Both mutations can result from reverse transcription errors, although the mutation  
334 leading to RT-184I is also within a dinucleotide context favored for A3G driven mutagenesis  
335 (e.g., GG-to-AG mutations, (ATGG->ATAG))(55, 60).

336 To further investigate the *in-vivo* dynamics of resistance appearance, we used a  
337 next generation sequencing approach to analyze a 250 bp region of HIV *RT* (codon 177 to  
338 258) from cell-free HIV RNA (vRNA) present in the plasma compartment. We combined a  
339 unique molecular ID (UMID) strategy, to compensate for PCR-mediated amplification bias  
340 and errors (61, 62), with 150 bp paired-end Illumina sequencing chemistry. Briefly, two  
341 series of custom primers with an 8 bp randomized IDs were used to tag HIV vRNA during

342 the reverse transcription step prior to amplification and sequencing. We sequenced a total  
343 of 111 vRNA samples obtained from 34 animals (primer #4372: 69 vRNA, 14 mice; primer  
344 #4633: 42 vRNA, 20 mice) generating a total of 9,705,468 high-quality paired-end reads  
345 representing 155,462 UMIDs (=individual HIV genomes). On average, we obtained 1,400  
346 UMIDs for each individual plasma sample generating between 1,333 and 17,854 unique *RT*  
347 consensus sequences for each infected animal over the course of the infection.

348 This approach, importantly, provides sufficient resolution to identify minority viral  
349 populations and provide insights into the composition of the viral quasispecies. We first  
350 analyzed the mutations present at codon 184 of *RT* (Figs. **3B-3D**). Minority 3TC resistant  
351 populations (defined as 1% or more of the overall number of UMIDs present in a given  
352 sample) were detectable after Day 30 post infection but prior to 3TC treatment in a third of  
353 the HIV-WT (N=4) and HIV-45G (N=5) infected mice (“pre-existing 3TC drug resistance”  
354 **Fig. 3B**). RT-184I resistant viruses were far more common than RT-184V (HIV-WT,  
355  $p=0.0342$ ; HIV-45G,  $p=0.0273$ ) but generally made up less than 10% of the sampled  
356 circulating viruses in a given animal. A combination of RT-184V and RT-184I was found in  
357 two animals (identified by the specific mouse number in **Fig. 3B**). Of note, when we stratified  
358 by treatment outcome, pre-existing 3TC drug resistance was not associated with treatment  
359 failure ( $p=0.5227$ , Fisher’s exact test) and did not display any significant relationship with  
360 rate of nadir formation (HIV-WT,  $p=0.0762$ ; HIV-45G,  $p=0.1115$ ) or rebound rate (HIV-WT,  
361  $p=0.3267$ ; HIV-45G,  $p=0.0849$ ).

362 We next examined the dynamics of 3TC drug resistance in treated mice (**Figs. 3C-**  
363 **3D**). In most animals, the 3TC-susceptible RT-184M majority was rapidly replaced with  
364 viruses encoding 3TC-resistant RT-184I or RT-184V alleles. On rare occasions,  
365 substitutions other than Valine or Isoleucine were detected at codon 184 (e.g., ACG (T),  
366 AAG (K)). The kinetics of RT-184I and RT-184V appearance in the plasma compartment  
367 were comparable in HIV-WT infected mice ( $p=0.2107$ , **Fig. 3C**) but RT-184I variants  
368 emerged 8.7 times more rapidly than RT-184V in HIV-45G infected mice ( $p=0.0035$ , **Fig.**  
369 **3D**). Overall, the relative proportion of the HIV-45G variants with RT-184V remained stable  
370 or declined over time while HIV-45G variants with RT-184I steadily increased (**Fig. 3D**).  
371 Thus, emergence of viral variants with RT-184I is favored over that of RT-184V variants in  
372 animals infected with a virus displaying suboptimal A3G neutralization activity. Of note,  
373 M184I variants also appear often prior to M184V variants in 3TC treated patients (53, 58).

## 374 **Characterization of *RT* sequence diversity throughout the course of infection**

375 We next determined sequence diversity within the sequenced *RT* region beyond the  
376 3TC drug resistance associated codon 184. We calculated the nucleotide diversity ( $\pi$ )  
377 among unique *RT* variants within a given plasma sample (63-65).

378 Prior to 3TC treatment (Day 30 post infection), mice infected with HIV-WT and HIV-  
379 45G showed comparable nucleotide diversity in *RT* ( $p=0.6308$ , **Fig. 4A**). However, when  
380 we assessed the relationship between *RT* nucleotide diversity and the plasma viral load  
381 measured at Day 30 (prior to treatment initiation), we noted that nucleotide diversity  
382 positively correlated with the level of plasma viremia in HIV-45G infected animals (**Fig. 4C**)  
383 while the opposite was true for HIV-WT infected animals (**Fig. 4B**). For this analysis we  
384 assumed an exponential (Malthusian) relationship based on the nature of HIV growth and  
385 diversity in acute infection (66, 67).

386 We next explored how *RT* sequence diversity changed throughout the course of  
387 infection. While *RT* diversity remained largely unchanged in treatment-naïve animals, both  
388 HIV-WT and HIV-45G diversity in treated animals initially increased but then stabilized (Day  
389 44 post infection, **Fig. 4D-E**). *RT* sequence diversity in 3TC treated mice was driven by drug  
390 resistance associated mutations. Indeed, mutations at *RT* codon 184 contributed to 49-  
391 74% of HIV-WT and 45-69% of HIV-45G diversity (data not shown). When we excluded  
392 codon 184 from  $\pi$  analyses, any increases in diversity from baseline to Day 44 through Day  
393 75 were lost in the HIV-WT infected mice ( $p \geq 0.3097$ ). However, when we did the same for  
394 HIV-45G infected mice, HIV-45G viruses displayed a significant increase in diversity starting  
395 at Day 58 through Day 75 post infection ( $p \leq 0.0430$ , Mann-Whitney). Thus, while the  
396 observed increase in *RT* sequence diversity is mainly due to selection of 3TC resistant  
397 variants, other sites within *RT* contribute to viral diversity in HIV-45G infected mice.  
398 However, these non-drug resistance associated changes in HIV-45G viruses are only  
399 observed at later time points suggesting that they require more time to appear.

400 Next, we explored the contribution of APOBEC3-driven mutagenesis to the *RT*  
401 sequence diversity. Towards this end, we measured G-to-A mutations within APOBEC3-  
402 specific dinucleotide motifs (e.g., A3G: GG-to-AG; A3D/A3F: GA-to-AA, (68)). The 250 bp  
403 long region of *RT* that we sequenced contains 15 GG and 25 GA dinucleotides that could  
404 serve as APOBEC3 target motifs. At Day 30 post infection (prior to 3TC treatment), both  
405 HIV-WT and HIV-45G viruses carried more GG-to-AG than GA-to-AA mutations but the



406 differences were only significant for the HIV-45G infected animals ( $p=0.0020$ , **Fig. 5A**). At  
407 Day 58 post infection in treated mice (**Fig. 5C**), GG-to-AG rates were higher than GA-to-AA  
408 rates in both HIV-WT ( $p=0.0078$ ) and HIV-45G ( $p=0.0020$ ) infected mice. GG-to-AG  
409 mutation rates in HIV-WT and HIV-45G mice were comparable ( $p=0.6965$ ) and were not  
410 due to selection of the RT-184I as rates were still comparable after analyses of sequences  
411 with codon 184 excluded ( $p=0.3445$ , Mann-Whitney).

412 Due to its preferred dinucleotide context, A3G-induced mutagenesis can introduce  
413 mutations resulting in premature stop codons (e.g., UGG-to-UAG, (7, 69, 70)). Given that  
414 premature stop codons within RT are deleterious to replication (71-76), we were surprised  
415 to see that most infected animals (10/14 HIV-WT, 11/12 HIV-45G) had, at least, one plasma  
416 viral genome with mutations resulting in a stop codon upon protein translation. HIV-WT and  
417 HIV-45G viral populations in the plasma displayed stop codons predominantly at the four  
418 tryptophan (UGG-to-UAG or -UGA) codons (e.g., W212, W229, W239, W252) and rarely,  
419 at one of the six glutamine encoding codons (CAG-to-UAG, CAA-to-UAA; Q182, Q197,  
420 Q207, Q222, Q242, Q258). Of the 155,462 unique RT analyzed, 868 carried mutations  
421 leading to premature stop codon. The majority of the RT sequences (85%) only had a single  
422 stop codon but a small portion of sequences had two (11%), three (3%) or, at most, four  
423 (1%) stop codons. The rate of stop codons at Day 30 and at Day 58 post infection was,  
424 however, comparable between the two groups ( $p=0.1294$ , **Fig. 5B**;  $p=0.1211$ , **Fig. 5D**).

425

#### 426 **Characterization of *vif* sequence diversity throughout the course of infection**

427 Lastly, we were interested in the extent to which the *vif* sequences changed over  
428 the course of infection. We used samples remaining from a subset of 14 animals included  
429 in Experiment #3 to sequence a 268 bp long region of HIV *vif* (corresponding with codons  
430 23 to 112) using a sequencing approach comprising UMID and Illumina 150 bp pair-end  
431 sequencing technology analogous to the approach taken for analyzing *RT* sequence  
432 diversity. In total, we generated 579,466 high quality paired-end reads representing 6,983  
433 distinct UMIDs from 27 plasma vRNA samples.

434 We first looked for evidence of HIV-45G revertants at Day 30 and Day 58 post  
435 infection in five Vif-45G infected animals (**Fig. 6A**). Viruses in HIV-45G infected animals  
436 carrying the Vif-45E reversion were rare at Day 30 post infection (less than 1% in all five



437 animals) but ranged between 0.5% and 9% of the plasma virus population present at Day  
438 58 post infection (**Fig. 6A**). These data suggest that the Vif-45G genotype is quite stable  
439 over time.

440         Since it has been suggested that *vif* diversification may be distinct from that of other  
441 HIV genes depending on the selective pressures exerted (7, 70, 77), we analyzed the  
442 nucleotide diversity, APOBEC3 driven mutagenesis and the rate of stop codons for the *vif*  
443 region sequenced (**Figs. 6B-6G**). The 268 bp long region of *vif* that we sequenced contains  
444 17 or 18 GG (HIV-WT, Vif E45 = GAA; HIV-45G, Vif E45G = GGA) and 22 GA dinucleotides  
445 that could serve as APOBEC3 target motifs. Prior to treatment (Day 30 post infection), *vif*  
446 sequence diversity (**Fig. 6B**), GG-to-AG/GA-to-AA mutation rates (**Fig. 6C**) and stop codon  
447 frequency (**Fig. 6C**) were comparable between HIV-WT and HIV-45G infected mice.  
448 However, at Day 58 post infection, the Vif diversity was significantly higher in HIV-45G  
449 viruses compared to their wild-type counterparts ( $p=0.0357$ , **Fig. 6E**). APOBEC3  
450 mutagenesis (GG-to-AG, GA-to-AA or rate of stop codon, **Figs. 6F-6G**) were comparable  
451 between the two groups.

452         Taken together, HIV-45G genotype can revert to wild-type Vif, but it only accounts  
453 for a small percentage of the circulating plasma variants in a portion of the mice tested.  
454 Moreover, there is some evidence suggesting that *RT* and *vif* regions diversity is caused by  
455 different mechanisms.

456

## 457 DISCUSSION

458 Proviruses with footprints of past cytidine deamination are found in many, if not all,  
459 HIV infected patients (11, 17, 22, 60, 78-83). Nonetheless, it remains controversial to what  
460 extent APOBEC3-driven mutagenesis contributes to viral evolution and HIV/AIDS disease  
461 outcome *in vivo*. Some clinical studies find correlations between frequency of G-to-A  
462 mutations in proviruses and plasma viral loads (7, 82, 84), whereas others fail to find such  
463 associations (17, 83, 85). Controlled experiments in cell culture, however, provide strong  
464 experimental evidence in support of the notion that A3G-driven mutagenesis facilitates HIV  
465 diversification and promote escape from selection pressure (44, 69, 86). In the current  
466 study, we perform controlled, *in vivo* infection experiments to provide new insights into the  
467 dynamics of HIV diversification within the plasma compartment of humanized mice in the  
468 absence and presence of selection pressure. We show that suboptimal neutralization of  
469 A3G shapes the phenotype of circulating viruses and compromises 3TC treatment  
470 outcomes.

471 Previous studies in cell culture (20, 44, 87) and in humanized mice (33-37) have  
472 examined the role of APOBEC3 proteins in HIV replication and pathogenesis *in vivo* but our  
473 study dissects the impact of A3G-driven mutagenesis in the context of viral evolution by  
474 introducing selection in the form of antiretroviral treatment. Moreover, we focus on viral  
475 diversification within the plasma compartment, which reflects the actively replicating viral  
476 quasispecies in an immediate and dynamic manner. HIV-45G, which has suboptimal anti-  
477 A3G activity, is less fit than HIV-WT in treatment-naïve animals overtime (**Fig. 2A**) pointing  
478 to the slow accumulation of mutations that fail to provide any evolutionary benefit given that  
479 hu-NSG mice lack immunologic pressures (i.e., CD4+/CD8+ T cell responses or antibodies  
480 (88)). Conversely, HIV-45G responds less well and rebounds more rapidly in the presence  
481 of 3TC treatment (**Figs. 2B-2D**). Thus, complete inactivation of A3G is dispensable for  
482 initiating a productive and robust infection of humanized mice and suboptimal A3G  
483 neutralization can be beneficial to HIV for overcoming evolutionary bottlenecks such as  
484 selection pressure by antiretroviral drugs.

485 Sequencing technologies have dramatically improved over the last decade allowing  
486 for high-resolution, accurate representation of viral quasispecies. We combined UMIDs with  
487 Illumina pair-end sequencing to analyze >150,000 individual *RT* sequences sampling  
488 approximately 1,170 distinct viral genomes for each individual time point. Previous studies

489 in humanized mice examined sequence diversity using bulk amplification followed by  
490 sequencing of individual clones (33-36) or by single-genome sequencing (SGS, (36)). The  
491 first of these methods fails to reliably distinguish between individual variants and may skew  
492 viral diversity measurements due to PCR errors or bias (61, 62). SGS is regarded as gold  
493 standard in the field since it analyses distinct genomes and provides information on large  
494 regions. However, the approach is very work intensive and costly, limiting the numbers of  
495 genomes that can be sampled (89-91). For example, one previous study used SGS to  
496 analyze a total of 265 genomes from eight mice (36). In our study, in contrast, we analyzed  
497 on average 1,400 *RT* sequences per infected animal providing us with solid data on minority  
498 viral populations. It has to be noted that even at our high sequencing depth, we only sample  
499 a limited portion of the viruses circulating in the plasma compartment (i.e., average plasma  
500 viremia at Day 30 post infection is 89,620 copies/mL). Despite this limitation, our  
501 sequencing data revealed a number of previously overlooked facts regarding the dynamics  
502 of HIV evolution *in vivo*. First, we found that 3TC drug resistant viral variants were found, in  
503 a third of the animals, prior to 3TC treatment initiation (**Fig. 3B**). Pre-existing 3TC resistance  
504 was, however, not linked to more rapid treatment failure suggesting that these viruses may  
505 not be replication competent. Second, we noted a positive correlation between increased  
506 *RT* sequence diversity and high plasma viremia in HIV-45G infected animals after 30 days  
507 of unchecked replication (**Fig. 4B**). This association is surprising since conventional wisdom  
508 would predict the opposite to be true. Indeed, this is exactly what we observe for HIV-WT  
509 infections where increased *RT* diversity is associated with lower plasma viremia (**Fig. 4C**).  
510 Third, the kinetics with which the two drug resistant variants RT-184I and RT-184V  
511 appeared in the plasma differed between the two viruses. In mice infected with HIV-45G,  
512 the RT-184I variants arose at a rate 8.3-times faster than that of RT-184V variants, whereas  
513 emergence rates for these variants were comparable in mice infected with HIV-WT (**Fig.**  
514 **3D**). However, RT-184I did not appear more readily in HIV-45G infected animals. This could  
515 be due to the fact that our earliest collection time point was ten days after treatment  
516 initiation. It is also conceivable that drug resistant variants first evolve, replicate and expand  
517 in tissue compartments with the plasma compartment being a mere reflection after the fact.

518 Taken together, future studies investigating the viral diversification at the viral  
519 RNA, cellular viral RNA and proviral level *in vivo* in the humanized model will provide  
520 further insights into how viral quasispecies shaped by APOBEC3 mutagenesis inform on  
521 HIV pathogenesis.

522 **ACKNOWLEDGMENTS**

523 We thank the Speck, Sachidanandam and Simon laboratories for insightful discussions.

524 This work was funded in part by NIH/NIAID grants AI064001, AI120998 (VS); NIH/NIGMS

525 grant GM113886 (LCF), NIH/NIGMS grant T32-GM007280 (MMH), the pre- and post-

526 doctoral USPHS Institutional Research Training Award T32-AI07647 (MMH), the clinical

527 research focus program “Human Hemato-Lymphatic Diseases” of the University of Zurich

528 (RFS) and SNF #310031\_153248/1 and matching funds, University of Zurich (RFS).

529

530

531 **FIGURE LEGENDS**

532

533 **Fig. 1:** Infection of humanized mice with HIV-Vif variants.

534 (A) Newborn NOD-scid IL-2R $\gamma$ -null (NSG) mice were irradiated after birth and transplanted  
535 with human donor cord blood-derived CD34+ cells. Mice were infected intraperitoneally with  
536  $2 \times 10^5$  TCID<sub>50</sub> of virus (HIV-WT, HIV-45G or HIV- $\Delta$ SLQ). The specifics for each of the three  
537 infection experiments are provided in the time-lines. Plasma was collected at the indicated  
538 time points for viremia measurements and sequence analysis.

539 (B) Comparison of the plasma viremia Day 30 post infection (baseline) in mice infected with  
540 the different viruses in the three different experiments. The lower limit of detection of the  
541 assay is 400 copies/mL (cp/mL). The mean and standard deviations of the viral loads are  
542 depicted. Viremia for HIV- $\Delta$ SLQ is significantly different from HIV-WT or HIV-45G ( $p \leq$   
543 0.0020, Mann-Whitney).

544

545

546 **Fig 2:** Viral replication in humanized mice in the absence or presence of 3TC treatment.

547 (A) Spaghetti plots depicting the change in viremia relative to baseline viral load (Day 30  
548 post infection) of individual untreated mice (pale lines) and mean change in viremia in  
549 untreated mice (bold lines).

550 (B) Barplots depicting the change in viremia at the end of infection (last available timepoint)  
551 versus baseline viremia in untreated mice. Means and standard deviation are depicted.  $p =$   
552 0.0026 by unpaired student's t-test.

553 (C) Spaghetti plots depicting the change in viremia in 3TC treated mice.

554 (D) Barplots depict the overall change in viremia at the end of infection in 3TC treated mice  
555 with means and standard deviations.  $p = 0.0045$  by unpaired student's t-test.

556 (E) Rebound viremia – defined as the maximum fold rebound viral load from nadir  
557 (maximum level of suppression observed;  $\log(VL_{\max}/VL_{\text{nadir}})$  – is depicted for mice treated  
558 with 3TC. Each point represents an individual mouse. Mean and standard deviations are  
559 depicted.  $p = 0.0068$  by Mann-Whitney test.

560 (F) Rate of rebound was also measured over the time from nadir to maximum viremia.  
561 Means and standard deviations depicted.  $p = 0.0052$  by unpaired student's t-test.

562 (G) Qualitative assessment of treatment outcomes. 3TC treatment was defined as  
563 successful if the viral rebound was less than  $0.5 \log_{10}$  from nadir. Conversely, treatment  
564 failure was met if the viral rebound was greater than  $0.5 \log_{10}$  from nadir.  $p = 0.0237$ , Fisher's  
565 exact test.

566

567

568 **Fig. 3:** Drug resistance development in 3TC treated mice.

569 (A) Genotypic 3TC drug resistance is due to single point mutations in codon 184 of HIV  
570 reverse transcriptase (*RT*) gene. Methionine (M184) represents the susceptible wild-type  
571 sequence while RT-184I or RT-184V render the virus resistant to 3TC.

572 (B) Pre-existing 3TC resistance detected at Day 30 post infection ("D30") prior to 3TC  
573 treatment initiation. Each dot represents the percentage of viruses encoding RT-184I or RT-  
574 184V in a given mouse. Minority 3TC resistant viral populations were defined as  
575 representing at least 1% of the total number of UMIDs sequenced for each mouse at this  
576 time point (dotted line). Some mice harbored both M184I/V variants and are indicated by  
577 mouse ID number. (\*)  $p \leq 0.05$ , Wilcoxon matched pairs signed rank test.

578 (C) Spaghetti plots longitudinally depicting the relative proportion of 3TC susceptible and  
579 resistant viral variants in HIV-WT infected mice. M184, RT-184I and RT-184V data for  
580 individual mice (pale lines) and mean proportions at each timepoint (bold lines) are  
581 depicted. Slopes of lines of best fit were calculated to measure kinetics of RT-184M, RT-  
582 184I and RT-184V variants. Slopes compared by F-test (ns: not significant,  $p = 0.5372$ ).

583 (D) Spaghetti plots longitudinally depicting the relative proportion of 3TC susceptible and  
584 resistant viral variants in HIV-45G infected mice. Slopes compared by F-test ( $p = 0.0035$ ).

585

586

587 **Fig. 4:** Genetic diversity of circulating viruses in the plasma of infected mice.

588 (A) Dot plot depicting nucleotide diversity ( $\pi$ ) in the sequenced HIV *RT* gene in HIV-WT and  
589 HIV-45G infected mice prior to initiation of 3TC treatment (30 Days post infection). Points  
590 represent  $\pi$  in each mouse and bars depict means.

591 (B) Diversity and viremia (VL) data in mice infected with HIV-WT prior to treatment were fit  
592 to a weighted nonlinear exponential growth (Malthusian) model. Best fit curve and 95%  
593 confidence interval (CI) bands are portrayed. The corresponding curve equation and  
594 weighted correlation coefficient (R) are depicted above.

595 (C) Diversity and VL data in mice infected with HIV-45G prior to treatment fit to an  
596 exponential growth model as in (B).

597 (D) Diversity in plasma viruses of HIV-WT infected mice over time (untreated left, 3TC  
598 treated right). Significance determined by Mann-Whitney test (\*,  $p \leq 0.05$ ; \*\*,  $p \leq 0.01$ ; \*\*\*,  
599  $p \leq 0.001$ ; \*\*\*\*,  $p \leq 0.0001$ ).

600 (E) Diversity in plasma viruses of HIV-45G infected mice over time (untreated left, 3TC  
601 treated right). Significance determined by Mann-Whitney test (\*,  $p \leq 0.05$ ; \*\*,  $p \leq 0.01$ ; \*\*\*,  
602  $p \leq 0.001$ ; \*\*\*\*,  $p \leq 0.0001$ ).

603

604



605 **Fig. 5:** Mutagenesis in HIV *RT* gene in plasma viruses of HIV infected mice.

606 **(A)** Dot plots depicting fractions of GG and GA dinucleotides mutated to AG (GG-to-AG)  
607 and AA (GA-to-AA), respectively, in individual mice (points) prior to 3TC treatment (Day 30  
608 post infection). Bars depict means.  $p = 0.0020$ , Wilcoxon matched pairs signed rank test.

609 **(B)** Stop codons were quantitated across all plasma sequences and a stop codon rate for  
610 every 1,000 codons sequenced was calculated for infected mice at Day 30 post infection.

611 **(C)** Fraction of GG-to-AG or GA-to-AA dinucleotides mutations in plasma samples at Day  
612 58 post infection in 3TC treated mice. (\*)  $p \leq 0.05$ , (\*\*)  $p \leq 0.01$ , Wilcoxon matched pairs  
613 signed rank test.

614 **(D)** Stop codon rate in plasma samples from Day 58 post infection.

615

616

617 **Fig. 6:** Characterizing HIV *Vif* mutations in infected mice.

618 (A) Genotype of *Vif* codon 45 in five mice infected with HIV-45G and treated with 3TC from  
619 30 to 58 Days post infection. Percentage of 45G and revertant E45 sequences indicated on  
620 stacked barplots. Percentages of the latter are annotated, as well.

621 (B) Dot plots depicting nucleotide diversity ( $\pi$ ) in *Vif* sequences in individual mice (points)  
622 infected with HIV-WT or HIV-45G at 30 Days post infection (prior to 3TC treatment). Bars  
623 depict means.

624 (C) Dot plots depicting fractions of GG and GA dinucleotides mutated to AG (GG-to-AG)  
625 and AA (GA-to-AA), respectively, in individual mice (points) at 30 Days post infection. Bars  
626 depict means.

627 (D) Stop codon rates were quantitated across plasma *Vif* sequences at Day 30 post  
628 infection (as in Fig. 5B).

629 (E) Dot plots depicting  $\pi$  in *Vif* sequences in individual mice (points) at Day 58 post infection  
630 in 3TC treated mice.  $p = 0.0357$ , Mann-Whitney test.

631 (F) Fraction of GG-to-AG or GA-to-AA dinucleotides mutated in *Vif* at Day 58 post infection  
632 in 3TC treated mice.

633 (G) Stop codon rate in *Vif* sequences determined at Day 58 post infection in 3TC treated  
634 mice.

635

636

637 **Supplemental Table 1.** Sequencing pipeline and primers for reverse transcription, PCR  
638 amplification and Illumina MiSeq sequencing.

639

## 640 REFERENCES

- 641 1. Wood N, Bhattacharya T, Keele BF, Giorgi E, Liu M, Gaschen B, Daniels M, Ferrari  
642 G, Haynes BF, McMichael A, Shaw GM, Hahn BH, Korber B, Seoighe C. 2009. HIV  
643 evolution in early infection: selection pressures, patterns of insertion and deletion,  
644 and the impact of APOBEC. *PLoS Pathog* 5:e1000414.
- 645 2. Rhodes TD, Nikolaitchik O, Chen J, Powell D, Hu WS. 2005. Genetic recombination  
646 of human immunodeficiency virus type 1 in one round of viral replication: effects of  
647 genetic distance, target cells, accessory genes, and lack of high negative  
648 interference in crossover events. *J Virol* 79:1666-77.
- 649 3. Smyth RP, Negroni M. 2016. A step forward understanding HIV-1 diversity.  
650 *Retrovirology* 13:27.
- 651 4. Ji JP, Loeb LA. 1992. Fidelity of HIV-1 reverse transcriptase copying RNA in vitro.  
652 *Biochemistry* 31:954-8.
- 653 5. Hu WS, Hughes SH. 2012. HIV-1 reverse transcription. *Cold Spring Harb Perspect*  
654 *Med* 2.
- 655 6. Malim MH. 2009. APOBEC proteins and intrinsic resistance to HIV-1 infection.  
656 *Philos Trans R Soc Lond B Biol Sci* 364:675-87.
- 657 7. Cuevas JM, Geller R, Garijo R, Lopez-Aldeguer J, Sanjuan R. 2015. Extremely High  
658 Mutation Rate of HIV-1 In Vivo. *PLoS Biol* 13:e1002251.
- 659 8. van Zyl G, Bale MJ, Kearney MF. 2018. HIV evolution and diversity in ART-treated  
660 patients. *Retrovirology* 15:14.
- 661 9. Desimie BA, Delviks-Frankenberry KA, Burdick RC, Qi D, Izumi T, Pathak VK.  
662 2014. Multiple APOBEC3 restriction factors for HIV-1 and one Vif to rule them all. *J*  
663 *Mol Biol* 426:1220-45.
- 664 10. Simon V, Bloch N, Landau NR. 2015. Intrinsic host restrictions to HIV-1 and  
665 mechanisms of viral escape. *Nat Immunol* 16:546-53.
- 666 11. Armitage AE, Deforche K, Welch JJ, Van Laethem K, Camacho R, Rambaut A,  
667 Iversen AK. 2014. Possible footprints of APOBEC3F and/or other APOBEC3  
668 deaminases, but not APOBEC3G, on HIV-1 from patients with acute/early and  
669 chronic infections. *J Virol* 88:12882-94.
- 670 12. Chaipan C, Smith JL, Hu WS, Pathak VK. 2013. APOBEC3G restricts HIV-1 to a  
671 greater extent than APOBEC3F and APOBEC3DE in human primary CD4+ T cells  
672 and macrophages. *J Virol* 87:444-53.
- 673 13. Harris RS, Bishop KN, Sheehy AM, Craig HM, Petersen-Mahrt SK, Watt IN,  
674 Neuberger MS, Malim MH. 2003. DNA deamination mediates innate immunity to  
675 retroviral infection. *Cell* 113:803-9.
- 676 14. Albin JS, Harris RS. 2010. Interactions of host APOBEC3 restriction factors with  
677 HIV-1 in vivo: implications for therapeutics. *Expert Rev Mol Med* 12:e4.
- 678 15. Janini M, Rogers M, Birx DR, McCutchan FE. 2001. Human Immunodeficiency Virus  
679 Type 1 DNA Sequences Genetically Damaged by Hypermutation Are Often  
680 Abundant in Patient Peripheral Blood Mononuclear Cells and May Be Generated

- 681 during Near-Simultaneous Infection and Activation of CD4+ T Cells. *Journal of*  
682 *Virology* 75:7973-7986.
- 683 16. Russell RA, Moore MD, Hu WS, Pathak VK. 2009. APOBEC3G induces a  
684 hypermutation gradient: purifying selection at multiple steps during HIV-1 replication  
685 results in levels of G-to-A mutations that are high in DNA, intermediate in cellular  
686 viral RNA, and low in virion RNA. *Retrovirology* 6:16.
- 687 17. Gandhi SK, Siliciano JD, Bailey JR, Siliciano RF, Blankson JN. 2008. Role of  
688 APOBEC3G/F-mediated hypermutation in the control of human immunodeficiency  
689 virus type 1 in elite suppressors. *J Virol* 82:3125-30.
- 690 18. Simon V, Zennou V, Murray D, Huang Y, Ho DD, Bieniasz PD. 2005. Natural  
691 variation in Vif: differential impact on APOBEC3G/3F and a potential role in HIV-1  
692 diversification. *PLoS Pathog* 1:e6.
- 693 19. Reddy K, Ooms M, Letko M, Garrett N, Simon V, Ndung'u T. 2016. Functional  
694 characterization of Vif proteins from HIV-1 infected patients with different  
695 APOBEC3G haplotypes. *AIDS* 30:1723-9.
- 696 20. Fourati S, Malet I, Binka M, Boukobza S, Wiriden M, Sayon S, Simon A, Katlama C,  
697 Simon V, Calvez V, Marcelin AG. 2010. Partially active HIV-1 Vif alleles facilitate  
698 viral escape from specific antiretrovirals. *AIDS* 24:2313-21.
- 699 21. Kourteva Y, De Pasquale M, Allos T, McMunn C, D'Aquila RT. 2012. APOBEC3G  
700 expression and hypermutation are inversely associated with human  
701 immunodeficiency virus type 1 (HIV-1) burden in vivo. *Virology* 430:1-9.
- 702 22. Kim EY, Lorenzo-Redondo R, Little SJ, Chung YS, Phalora PK, Maljkovic Berry I,  
703 Archer J, Penugonda S, Fischer W, Richman DD, Bhattacharya T, Malim MH,  
704 Wolinsky SM. 2014. Human APOBEC3 induced mutation of human  
705 immunodeficiency virus type-1 contributes to adaptation and evolution in natural  
706 infection. *PLoS Pathog* 10:e1004281.
- 707 23. Shultz LD, Brehm MA, Garcia-Martinez JV, Greiner DL. 2012. Humanized mice for  
708 immune system investigation: progress, promise and challenges. *Nat Rev Immunol*  
709 12:786-98.
- 710 24. Dudek TE, No DC, Seung E, Vrbanac VD, Fadda L, Bhoumik P, Boutwell CL, Power  
711 KA, Gladden AD, Battis L, Mellors EF, Tivey TR, Gao X, Altfeld M, Luster AD, Tager  
712 AM, Allen TM. 2012. Rapid evolution of HIV-1 to functional CD8(+) T cell responses  
713 in humanized BLT mice. *Sci Transl Med* 4:143ra98.
- 714 25. Melkus MW, Estes JD, Padgett-Thomas A, Gatlin J, Denton PW, Othieno FA, Wege  
715 AK, Haase AT, Garcia JV. 2006. Humanized mice mount specific adaptive and  
716 innate immune responses to EBV and TSST-1. *Nat Med* 12:1316-22.
- 717 26. Denton PW, Olesen R, Choudhary SK, Archin NM, Wahl A, Swanson MD, Chateau  
718 M, Nochi T, Krisko JF, Spagnuolo RA, Margolis DM, Garcia JV. 2012. Generation  
719 of HIV latency in humanized BLT mice. *J Virol* 86:630-4.
- 720 27. Denton PW, Othieno F, Martinez-Torres F, Zou W, Krisko JF, Fleming E, Zein S,  
721 Powell DA, Wahl A, Kwak YT, Welch BD, Kay MS, Payne DA, Gallay P, Appella E,  
722 Estes JD, Lu M, Garcia JV. 2011. One percent tenofovir applied topically to  
723 humanized BLT mice and used according to the CAPRISA 004 experimental design

- 724 demonstrates partial protection from vaginal HIV infection, validating the BLT model  
725 for evaluation of new microbicide candidates. *J Virol* 85:7582-93.
- 726 28. Horwitz JA, Halper-Stromberg A, Mouquet H, Gitlin AD, Tretiakova A, Eisenreich  
727 TR, Malbec M, Gravemann S, Billerbeck E, Dorner M, Buning H, Schwartz O, Knops  
728 E, Kaiser R, Seaman MS, Wilson JM, Rice CM, Ploss A, Bjorkman PJ, Klein F,  
729 Nussenzweig MC. 2013. HIV-1 suppression and durable control by combining single  
730 broadly neutralizing antibodies and antiretroviral drugs in humanized mice. *Proc Natl  
731 Acad Sci U S A* 110:16538-43.
- 732 29. Nischang M, Suttmuller R, Gers-Huber G, Audige A, Li D, Rochat MA, Baenziger S,  
733 Hofer U, Schlaepfer E, Regenass S, Amssoms K, Stoops B, Van Cauwenberge A,  
734 Boden D, Kraus G, Speck RF. 2012. Humanized mice recapitulate key features of  
735 HIV-1 infection: a novel concept using long-acting anti-retroviral drugs for treating  
736 HIV-1. *PLoS One* 7:e38853.
- 737 30. Ince WL, Zhang L, Jiang Q, Arrildt K, Su L, Swanstrom R. 2010. Evolution of the  
738 HIV-1 env gene in the Rag2<sup>-/-</sup> gammaC<sup>-/-</sup> humanized mouse model. *J Virol*  
739 84:2740-52.
- 740 31. Yamada E, Yoshikawa R, Nakano Y, Misawa N, Koyanagi Y, Sato K. 2015. Impacts  
741 of humanized mouse models on the investigation of HIV-1 infection: illuminating the  
742 roles of viral accessory proteins in vivo. *Viruses* 7:1373-90.
- 743 32. Zhang L, Su L. 2012. HIV-1 immunopathogenesis in humanized mouse models. *Cell  
744 Mol Immunol* 9:237-44.
- 745 33. Sato K, Izumi T, Misawa N, Kobayashi T, Yamashita Y, Ohmichi M, Ito M, Takaori-  
746 Kondo A, Koyanagi Y. 2010. Remarkable lethal G-to-A mutations in vif-proficient  
747 HIV-1 provirus by individual APOBEC3 proteins in humanized mice. *J Virol* 84:9546-  
748 56.
- 749 34. Krisko JF, Martinez-Torres F, Foster JL, Garcia JV. 2013. HIV restriction by  
750 APOBEC3 in humanized mice. *PLoS Pathog* 9:e1003242.
- 751 35. Krisko JF, Begum N, Baker CE, Foster JL, Garcia JV. 2016. APOBEC3G and  
752 APOBEC3F Act in Concert To Extinguish HIV-1 Replication. *J Virol* 90:4681-4695.
- 753 36. Sato K, Takeuchi JS, Misawa N, Izumi T, Kobayashi T, Kimura Y, Iwami S, Takaori-  
754 Kondo A, Hu WS, Aihara K, Ito M, An DS, Pathak VK, Koyanagi Y. 2014.  
755 APOBEC3D and APOBEC3F potentially promote HIV-1 diversification and evolution  
756 in humanized mouse model. *PLoS Pathog* 10:e1004453.
- 757 37. Nakano Y, Misawa N, Juarez-Fernandez G, Moriwaki M, Nakaoka S, Funo T,  
758 Yamada E, Soper A, Yoshikawa R, Ebrahimi D, Tachiki Y, Iwami S, Harris RS,  
759 Koyanagi Y, Sato K. 2017. HIV-1 competition experiments in humanized mice show  
760 that APOBEC3H imposes selective pressure and promotes virus adaptation. *PLoS  
761 Pathog* 13:e1006348.
- 762 38. Derdeyn CA, Decker JM, Sfakianos JN, Wu X, O'Brien WA, Ratner L, Kappes JC,  
763 Shaw GM, Hunter E. 2000. Sensitivity of human immunodeficiency virus type 1 to  
764 the fusion inhibitor T-20 is modulated by coreceptor specificity defined by the V3  
765 loop of gp120. *J Virol* 74:8358-67.

- 766 39. Platt EJ, Bilaska M, Kozak SL, Kabat D, Montefiori DC. 2009. Evidence that ecotropic  
767 murine leukemia virus contamination in TZM-bl cells does not affect the outcome of  
768 neutralizing antibody assays with human immunodeficiency virus type 1. *J Virol*  
769 83:8289-92.
- 770 40. Platt EJ, Wehrly K, Kuhmann SE, Chesebro B, Kabat D. 1998. Effects of CCR5 and  
771 CD4 cell surface concentrations on infections by macrophagetropic isolates of  
772 human immunodeficiency virus type 1. *J Virol* 72:2855-64.
- 773 41. Takeuchi Y, McClure MO, Pizzato M. 2008. Identification of gammaretroviruses  
774 constitutively released from cell lines used for human immunodeficiency virus  
775 research. *J Virol* 82:12585-8.
- 776 42. Wei X, Decker JM, Liu H, Zhang Z, Arani RB, Kilby JM, Saag MS, Wu X, Shaw GM,  
777 Kappes JC. 2002. Emergence of resistant human immunodeficiency virus type 1 in  
778 patients receiving fusion inhibitor (T-20) monotherapy. *Antimicrob Agents*  
779 *Chemother* 46:1896-905.
- 780 43. Adachi A, Gendelman HE, Koenig S, Folks T, Willey R, Rabson A, Martin MA. 1986.  
781 Production of acquired immunodeficiency syndrome-associated retrovirus in human  
782 and nonhuman cells transfected with an infectious molecular clone. *J Virol* 59:284-  
783 91.
- 784 44. Mulder LC, Harari A, Simon V. 2008. Cytidine deamination induced HIV-1 drug  
785 resistance. *Proc Natl Acad Sci U S A* 105:5501-6.
- 786 45. Moore JP, McKeating JA, Weiss RA, Sattentau QJ. 1990. Dissociation of gp120  
787 from HIV-1 virions induced by soluble CD4. *Science* 250:1139-42.
- 788 46. Zhang J, Kobert K, Flouri T, Stamatakis A. 2014. PEAR: a fast and accurate Illumina  
789 Paired-End reAd mergeR. *Bioinformatics* 30:614-20.
- 790 47. Librado P, Rozas J. 2009. DnaSP v5: a software for comprehensive analysis of DNA  
791 polymorphism data. *Bioinformatics* 25:1451-2.
- 792 48. Ooms M, Brayton B, Letko M, Maio SM, Pilcher CD, Hecht FM, Barbour JD, Simon  
793 V. 2013. HIV-1 Vif adaptation to human APOBEC3H haplotypes. *Cell Host Microbe*  
794 14:411-21.
- 795 49. Russell RA, Pathak VK. 2007. Identification of two distinct human immunodeficiency  
796 virus type 1 Vif determinants critical for interactions with human APOBEC3G and  
797 APOBEC3F. *J Virol* 81:8201-10.
- 798 50. Feng Y, Baig TT, Love RP, Chelico L. 2014. Suppression of APOBEC3-mediated  
799 restriction of HIV-1 by Vif. *Front Microbiol* 5:450.
- 800 51. Henriot S, Mercenne G, Bernacchi S, Paillart JC, Marquet R. 2009. Tumultuous  
801 relationship between the human immunodeficiency virus type 1 viral infectivity factor  
802 (Vif) and the human APOBEC-3G and APOBEC-3F restriction factors. *Microbiol Mol*  
803 *Biol Rev* 73:211-32.
- 804 52. Schinazi RF, Lloyd RM, Jr., Nguyen MH, Cannon DL, McMillan A, Ilksoy N, Chu CK,  
805 Liotta DC, Bazmi HZ, Mellors JW. 1993. Characterization of human  
806 immunodeficiency viruses resistant to oxathiolane-cytosine nucleosides. *Antimicrob*  
807 *Agents Chemother* 37:875-81.



- 808 53. Schuurman R, Nijhuis M, van Leeuwen R, Schipper P, de Jong D, Collis P, Danner  
809 SA, Mulder J, Loveday C, Christopherson C, et al. 1995. Rapid changes in human  
810 immunodeficiency virus type 1 RNA load and appearance of drug-resistant virus  
811 populations in persons treated with lamivudine (3TC). *J Infect Dis* 171:1411-9.
- 812 54. Wainberg MA, Drosopoulos WC, Salomon H, Hsu M, Borkow G, Parniak M, Gu Z,  
813 Song Q, Manne J, Islam S, Castriota G, Prasad VR. 1996. Enhanced fidelity of 3TC-  
814 selected mutant HIV-1 reverse transcriptase. *Science* 271:1282-5.
- 815 55. Keulen W, Back NK, van Wijk A, Boucher CA, Berkhout B. 1997. Initial appearance  
816 of the 184Ile variant in lamivudine-treated patients is caused by the mutational bias  
817 of human immunodeficiency virus type 1 reverse transcriptase. *J Virol* 71:3346-50.
- 818 56. Sarafianos SG, Das K, Clark AD, Jr., Ding J, Boyer PL, Hughes SH, Arnold E. 1999.  
819 Lamivudine (3TC) resistance in HIV-1 reverse transcriptase involves steric  
820 hindrance with beta-branched amino acids. *Proc Natl Acad Sci U S A* 96:10027-32.
- 821 57. Gao HQ, Boyer PL, Sarafianos SG, Arnold E, Hughes SH. 2000. The role of steric  
822 hindrance in 3TC resistance of human immunodeficiency virus type-1 reverse  
823 transcriptase. *J Mol Biol* 300:403-18.
- 824 58. Frost SD, Nijhuis M, Schuurman R, Boucher CA, Brown AJ. 2000. Evolution of  
825 lamivudine resistance in human immunodeficiency virus type 1-infected individuals:  
826 the relative roles of drift and selection. *J Virol* 74:6262-8.
- 827 59. Brenner BG, Turner D, Wainberg MA. 2002. HIV-1 drug resistance: can we  
828 overcome? *Expert Opin Biol Ther* 2:751-61.
- 829 60. Berkhout B, de Ronde A. 2004. APOBEC3G versus reverse transcriptase in the  
830 generation of HIV-1 drug-resistance mutations. *AIDS* 18:1861-3.
- 831 61. Jabara CB, Jones CD, Roach J, Anderson JA, Swanstrom R. 2011. Accurate  
832 sampling and deep sequencing of the HIV-1 protease gene using a Primer ID. *Proc*  
833 *Natl Acad Sci U S A* 108:20166-71.
- 834 62. Keys JR, Zhou S, Anderson JA, Eron JJ, Jr., Rackoff LA, Jabara C, Swanstrom R.  
835 2015. Primer ID Informs Next-Generation Sequencing Platforms and Reveals  
836 Preexisting Drug Resistance Mutations in the HIV-1 Reverse Transcriptase Coding  
837 Domain. *AIDS Res Hum Retroviruses* 31:658-68.
- 838 63. Nei M, Kumar, S. 2000. *Molecular Evolution and Phylogenetics*. Oxford University  
839 Press, New York.
- 840 64. Nei M, Gojobori T. 1986. Simple methods for estimating the numbers of synonymous  
841 and nonsynonymous nucleotide substitutions. *Mol Biol Evol* 3:418-26.
- 842 65. Nelson CW, Hughes AL. 2015. Within-host nucleotide diversity of virus populations:  
843 insights from next-generation sequencing. *Infect Genet Evol* 30:1-7.
- 844 66. Alizon S, Magnus C. 2012. Modelling the course of an HIV infection: insights from  
845 ecology and evolution. *Viruses* 4:1984-2013.
- 846 67. Lima K, Leal E, Cavalcanti AMS, Salustiano DM, de Medeiros LB, da Silva SP,  
847 Lacerda HR. 2017. Increase in human immunodeficiency virus 1 diversity and  
848 detection of various subtypes and recombinants in north-eastern Brazil. *J Med*  
849 *Microbiol* 66:526-535.

- 850 68. Refsland EW, Hultquist JF, Harris RS. 2012. Endogenous origins of HIV-1 G-to-A  
851 hypermutation and restriction in the nonpermissive T cell line CEM2n. *PLoS Pathog*  
852 8:e1002800.
- 853 69. Sadler HA, Stenglein MD, Harris RS, Mansky LM. 2010. APOBEC3G contributes to  
854 HIV-1 variation through sublethal mutagenesis. *J Virol* 84:7396-404.
- 855 70. Armitage AE, Deforche K, Chang CH, Wee E, Kramer B, Welch JJ, Gerstoff J,  
856 Fugger L, McMichael A, Rambaut A, Iversen AK. 2012. APOBEC3G-induced  
857 hypermutation of human immunodeficiency virus type-1 is typically a discrete "all or  
858 nothing" phenomenon. *PLoS Genet* 8:e1002550.
- 859 71. Bruner KM, Murray AJ, Pollack RA, Soliman MG, Laskey SB, Capoferri AA, Lai J,  
860 Strain MC, Lada SM, Hoh R, Ho YC, Richman DD, Deeks SG, Siliciano JD, Siliciano  
861 RF. 2016. Defective proviruses rapidly accumulate during acute HIV-1 infection. *Nat*  
862 *Med* 22:1043-9.
- 863 72. Ho YC, Shan L, Hosmane NN, Wang J, Laskey SB, Rosenbloom DI, Lai J, Blankson  
864 JN, Siliciano JD, Siliciano RF. 2013. Replication-competent noninduced proviruses  
865 in the latent reservoir increase barrier to HIV-1 cure. *Cell* 155:540-51.
- 866 73. Imamichi H, Dewar RL, Adelsberger JW, Rehm CA, O'Doherty U, Paxinos EE, Fauci  
867 AS, Lane HC. 2016. Defective HIV-1 proviruses produce novel protein-coding RNA  
868 species in HIV-infected patients on combination antiretroviral therapy. *Proc Natl*  
869 *Acad Sci U S A* 113:8783-8.
- 870 74. Pollack RA, Jones RB, Perteau M, Bruner KM, Martin AR, Thomas AS, Capoferri AA,  
871 Beg SA, Huang SH, Karandish S, Hao H, Halper-Stromberg E, Yong PC, Kovacs C,  
872 Benko E, Siliciano RF, Ho YC. 2017. Defective HIV-1 Proviruses Are Expressed and  
873 Can Be Recognized by Cytotoxic T Lymphocytes, which Shape the Proviral  
874 Landscape. *Cell Host Microbe* 21:494-506 e4.
- 875 75. Grant RM, Abrams DI. 1998. Not all is dead in HIV-1 graveyard. *Lancet* 351:308-9.
- 876 76. Maldarelli F. 2016. The role of HIV integration in viral persistence: no more whistling  
877 past the proviral graveyard. *J Clin Invest* 126:438-47.
- 878 77. Kijak GH, Janini LM, Tovanabuttra S, Sanders-Buell E, Arroyo MA, Robb ML,  
879 Michael NL, Birx DL, McCutchan FE. 2008. Variable contexts and levels of  
880 hypermutation in HIV-1 proviral genomes recovered from primary peripheral blood  
881 mononuclear cells. *Virology* 376:101-11.
- 882 78. Fourati S, Lambert-Niclot S, Soulie C, Malet I, Valantin MA, Descours B, Ait-Arkoub  
883 Z, Mory B, Carcelain G, Katlama C, Calvez V, Marcelin AG. 2012. HIV-1 genome is  
884 often defective in PBMCs and rectal tissues after long-term HAART as a result of  
885 APOBEC3 editing and correlates with the size of reservoirs. *J Antimicrob Chemother*  
886 67:2323-6.
- 887 79. Jern P, Russell RA, Pathak VK, Coffin JM. 2009. Likely role of APOBEC3G-  
888 mediated G-to-A mutations in HIV-1 evolution and drug resistance. *PLoS Pathog*  
889 5:e1000367.
- 890 80. Karlsson AC, Iversen AK, Chapman JM, de Oliveira T, Spotts G, McMichael AJ,  
891 Davenport MP, Hecht FM, Nixon DF. 2007. Sequential broadening of CTL  
892 responses in early HIV-1 infection is associated with viral escape. *PLoS One* 2:e225.



- 893 81. Kieffer TL, Finucane MM, Nettles RE, Quinn TC, Broman KW, Ray SC, Persaud D,  
894 Siliciano RF. 2004. Genotypic analysis of HIV-1 drug resistance at the limit of  
895 detection: virus production without evolution in treated adults with undetectable HIV  
896 loads. *J Infect Dis* 189:1452-65.
- 897 82. Pace C, Keller J, Nolan D, James I, Gaudieri S, Moore C, Mallal S. 2006. Population  
898 level analysis of human immunodeficiency virus type 1 hypermutation and its  
899 relationship with APOBEC3G and vif genetic variation. *J Virol* 80:9259-69.
- 900 83. Piantadosi A, Humes D, Chohan B, McClelland RS, Overbaugh J. 2009. Analysis of  
901 the percentage of human immunodeficiency virus type 1 sequences that are  
902 hypermutated and markers of disease progression in a longitudinal cohort, including  
903 one individual with a partially defective Vif. *J Virol* 83:7805-14.
- 904 84. de Lima-Stein ML, Alkmim WT, Bizinoto MC, Lopez LF, Burattini MN, Maricato JT,  
905 Giron L, Sucupira MC, Diaz RS, Janini LM. 2014. In vivo HIV-1 hypermutation and  
906 viral loads among antiretroviral-naive Brazilian patients. *AIDS Res Hum  
907 Retroviruses* 30:867-80.
- 908 85. Amoedo ND, Afonso AO, Cunha SM, Oliveira RH, Machado ES, Soares MA. 2011.  
909 Expression of APOBEC3G/3F and G-to-A hypermutation levels in HIV-1-infected  
910 children with different profiles of disease progression. *PLoS One* 6:e24118.
- 911 86. Kim EY, Bhattacharya T, Kunstman K, Swantek P, Koning FA, Malim MH, Wolinsky  
912 SM. 2010. Human APOBEC3G-mediated editing can promote HIV-1 sequence  
913 diversification and accelerate adaptation to selective pressure. *J Virol* 84:10402-5.
- 914 87. Hache G, Abbink TE, Berkhout B, Harris RS. 2009. Optimal translation initiation  
915 enables Vif-deficient human immunodeficiency virus type 1 to escape restriction by  
916 APOBEC3G. *J Virol* 83:5956-60.
- 917 88. Nixon CC, Mavigner M, Silvestri G, Garcia JV. 2017. In Vivo Models of Human  
918 Immunodeficiency Virus Persistence and Cure Strategies. *J Infect Dis* 215:S142-  
919 S151.
- 920 89. Salazar-Gonzalez JF, Bailes E, Pham KT, Salazar MG, Guffey MB, Keele BF,  
921 Derdeyn CA, Farmer P, Hunter E, Allen S, Manigart O, Mulenga J, Anderson JA,  
922 Swanstrom R, Haynes BF, Athreya GS, Korber BT, Sharp PM, Shaw GM, Hahn BH.  
923 2008. Deciphering human immunodeficiency virus type 1 transmission and early  
924 envelope diversification by single-genome amplification and sequencing. *J Virol*  
925 82:3952-70.
- 926 90. Keele BF, Giorgi EE, Salazar-Gonzalez JF, Decker JM, Pham KT, Salazar MG, Sun  
927 C, Grayson T, Wang S, Li H, Wei X, Jiang C, Kirchherr JL, Gao F, Anderson JA,  
928 Ping LH, Swanstrom R, Tomaras GD, Blattner WA, Goepfert PA, Kilby JM, Saag  
929 MS, Delwart EL, Busch MP, Cohen MS, Montefiori DC, Haynes BF, Gaschen B,  
930 Athreya GS, Lee HY, Wood N, Seoighe C, Perelson AS, Bhattacharya T, Korber BT,  
931 Hahn BH, Shaw GM. 2008. Identification and characterization of transmitted and  
932 early founder virus envelopes in primary HIV-1 infection. *Proc Natl Acad Sci U S A*  
933 105:7552-7.
- 934 91. Palmer S, Kearney M, Maldarelli F, Halvas EK, Bixby CJ, Bazmi H, Rock D, Falloon  
935 J, Davey RT, Jr., Dewar RL, Metcalf JA, Hammer S, Mellors JW, Coffin JM. 2005.  
936 Multiple, linked human immunodeficiency virus type 1 drug resistance mutations in

937 treatment-experienced patients are missed by standard genotype analysis. J Clin  
938 Microbiol 43:406-13.  
939

# Hernandez et al., Figure 1

**A**

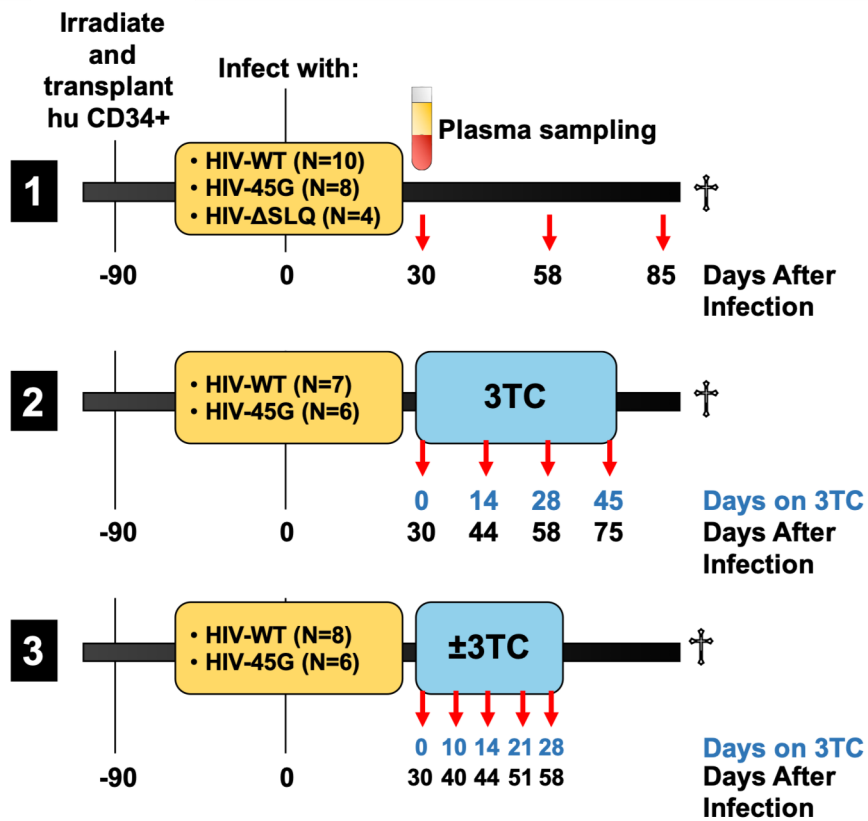

**B**

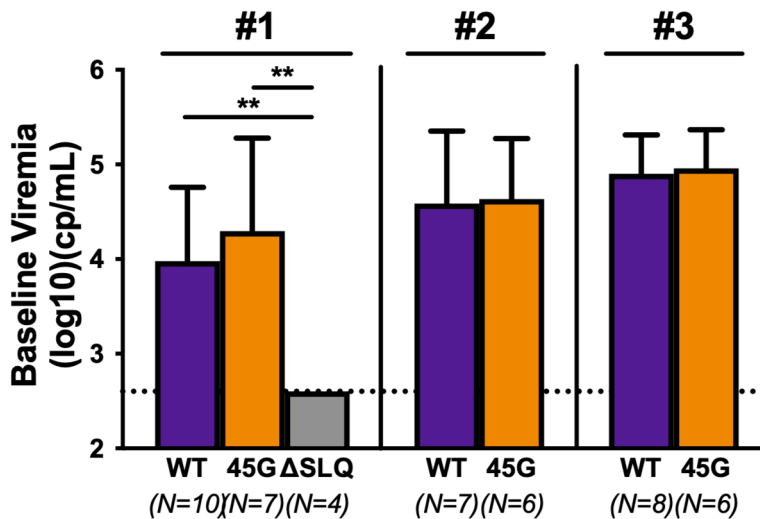

## Hernandez et al., Figure 2

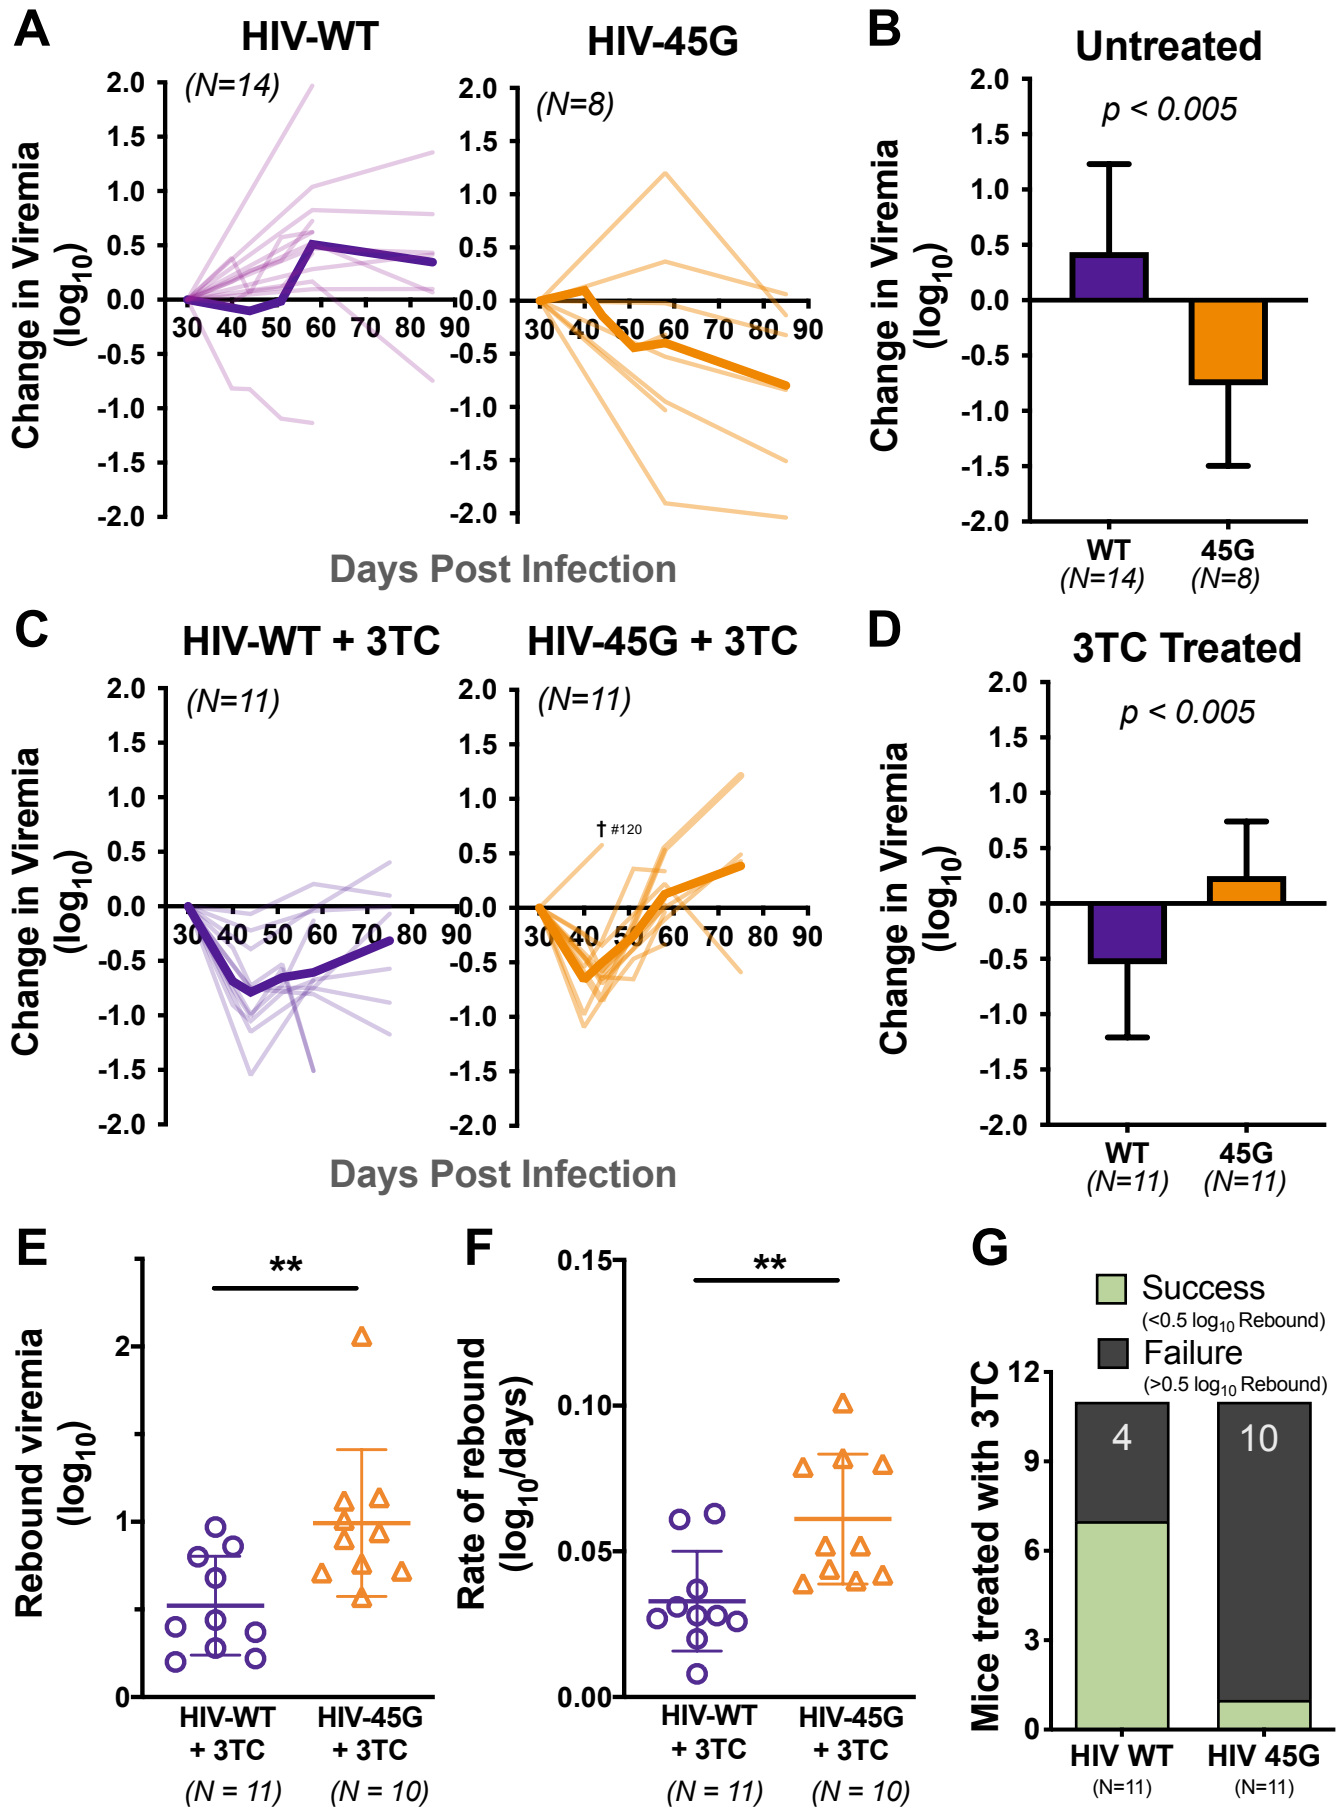

## Hernandez et al., Figure 3

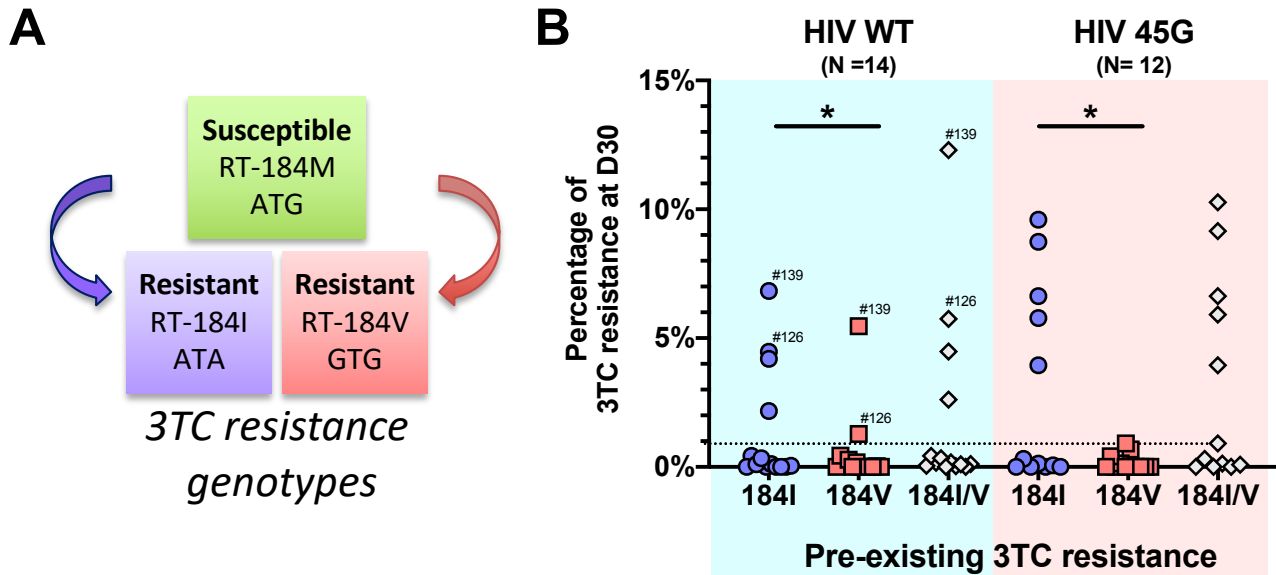

### C Mice infected with HIV WT and treated with 3TC

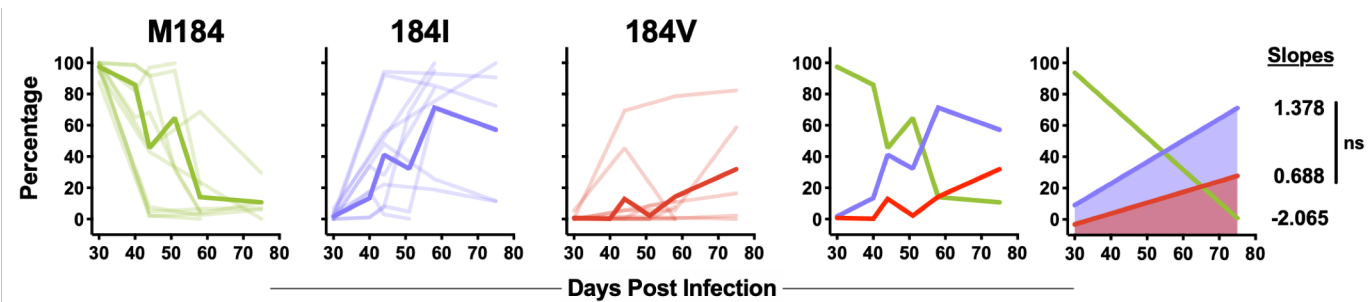

### D Mice infected with HIV 45G and treated with 3TC

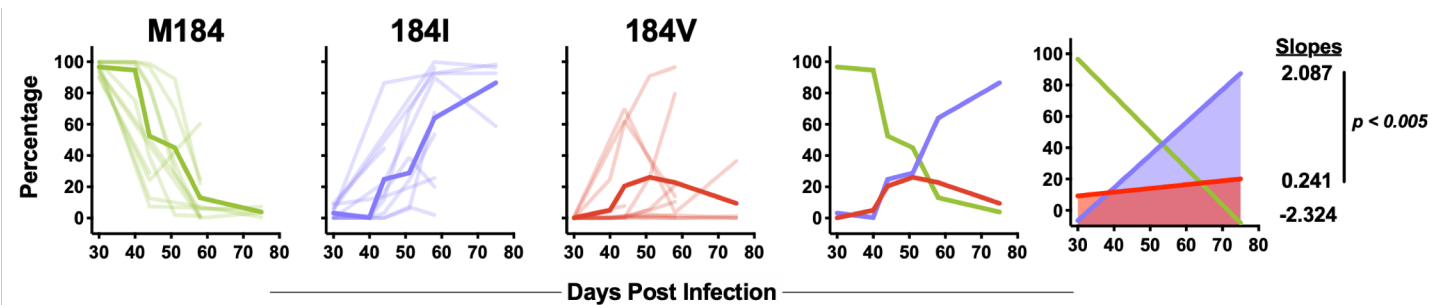

## Hernandez et al., Figure 4

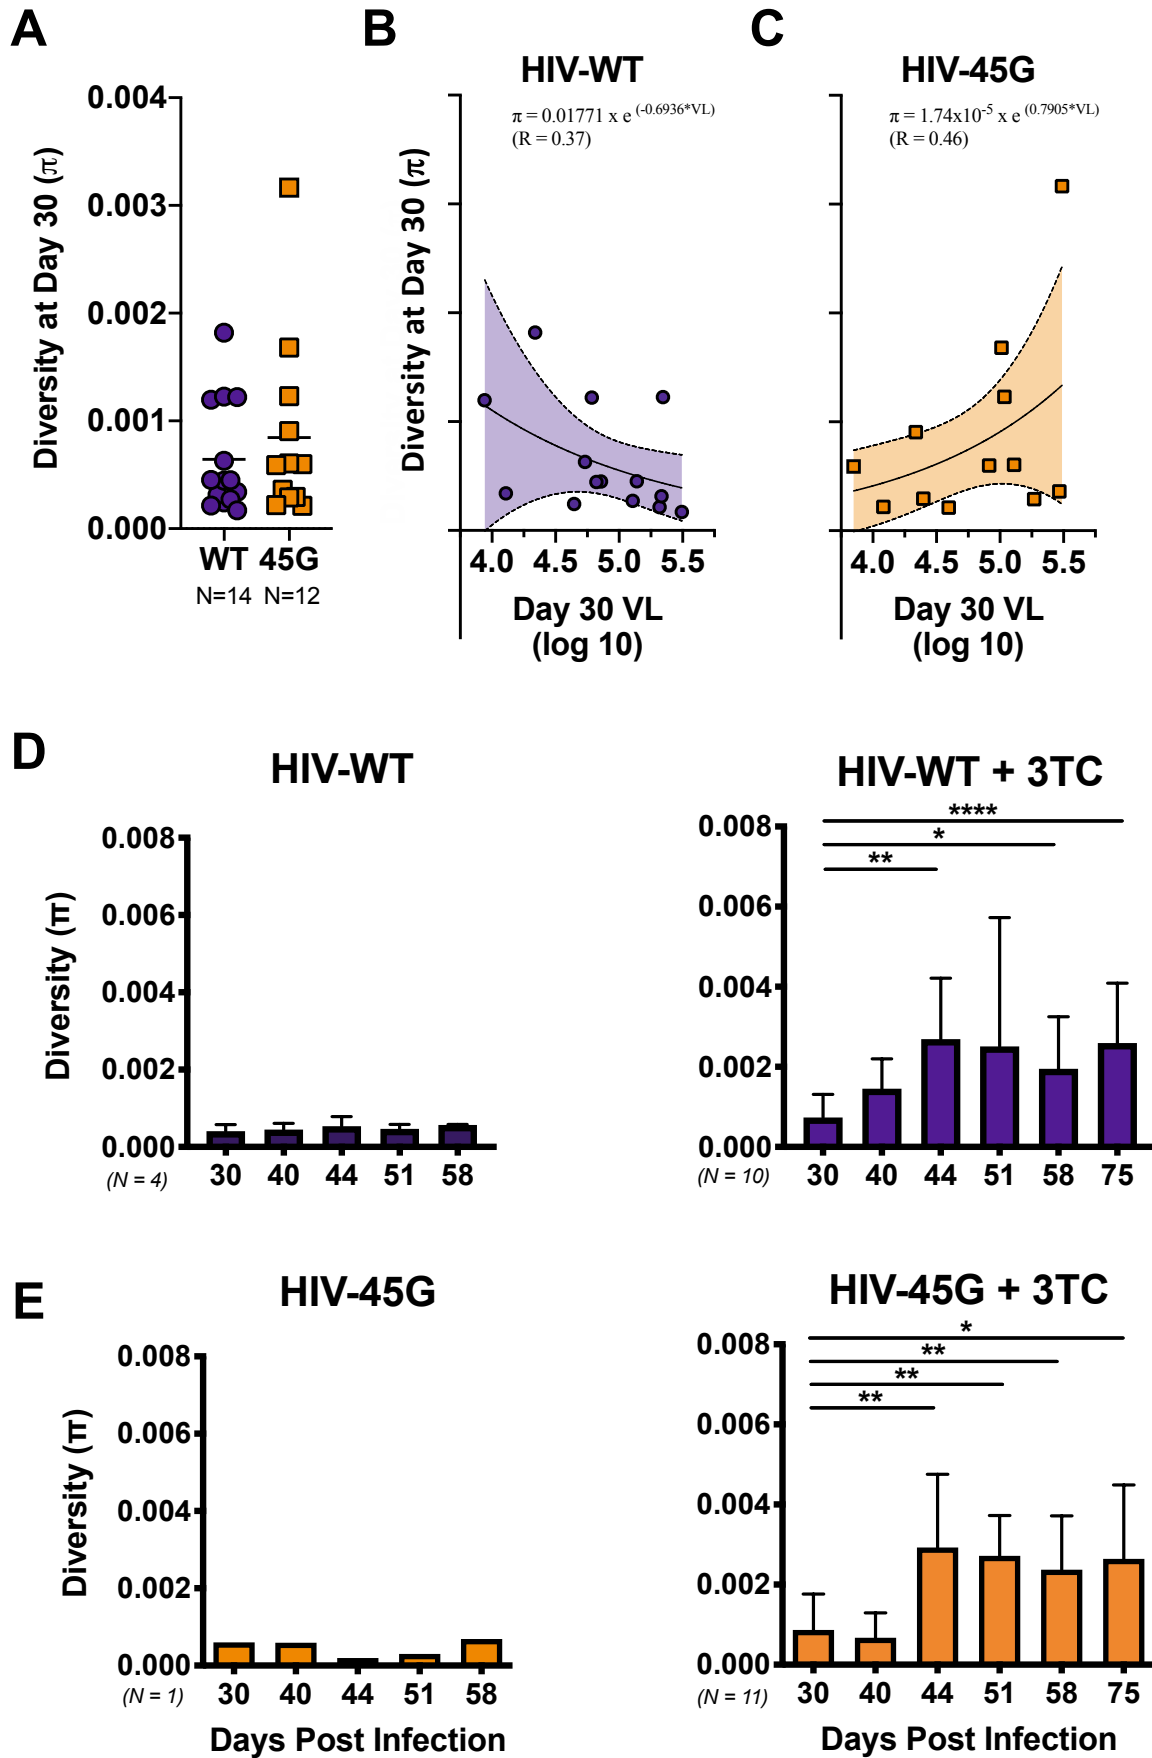

## Hernandez et al., Figure 5

**A**

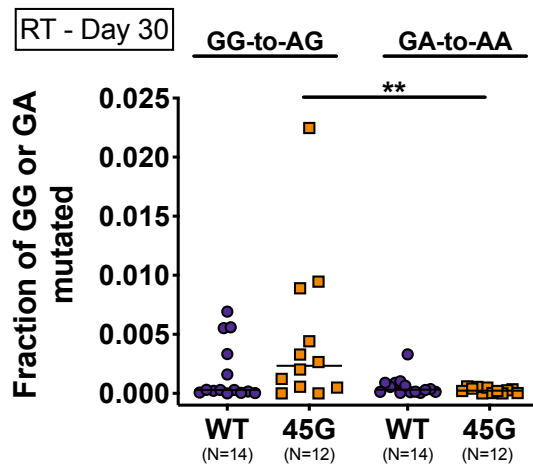

**B**

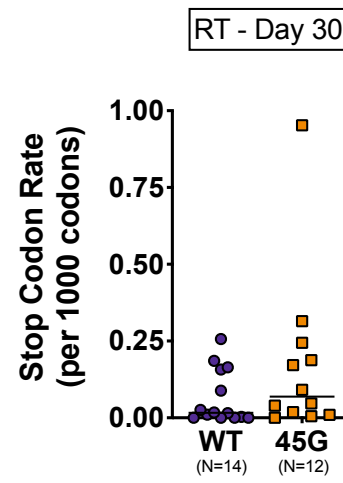

**C**

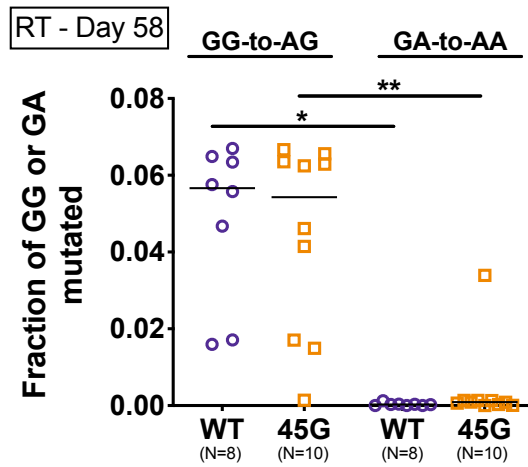

**D**

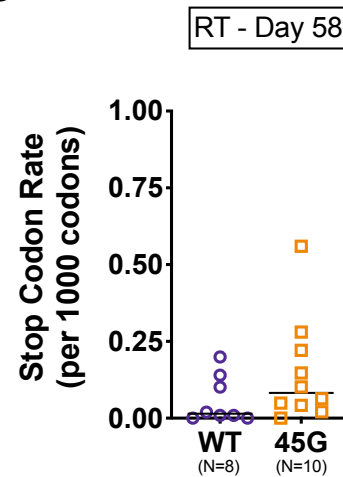

## Hernandez et al., Figure 6

**A**

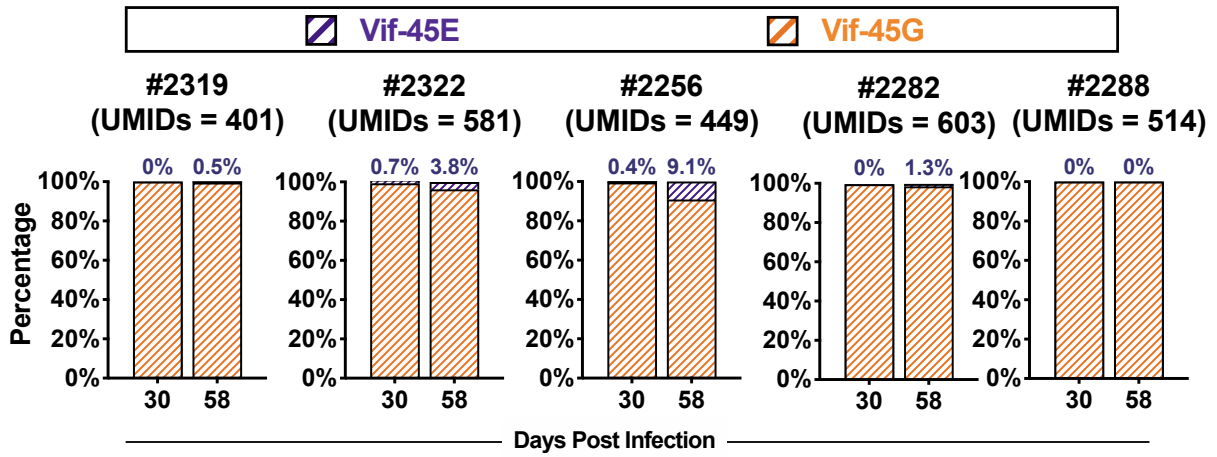

**B**

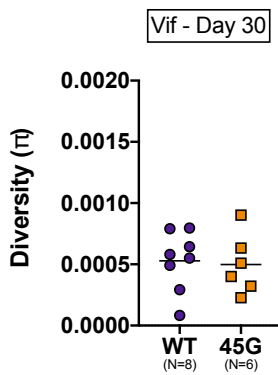

**C**

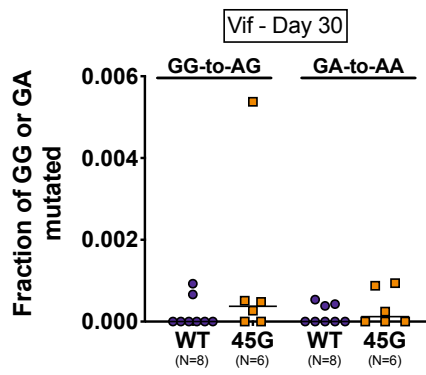

**D**

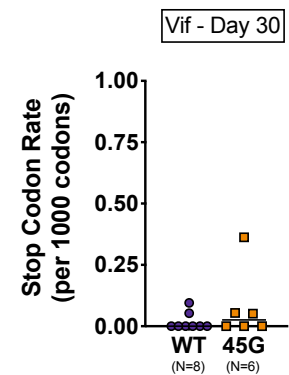

**E**

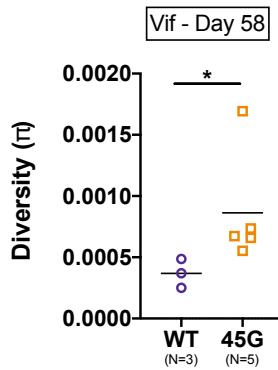

**F**

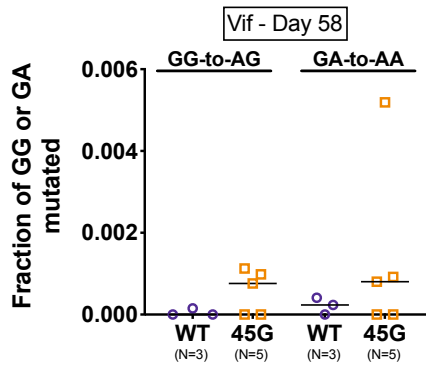

**G**

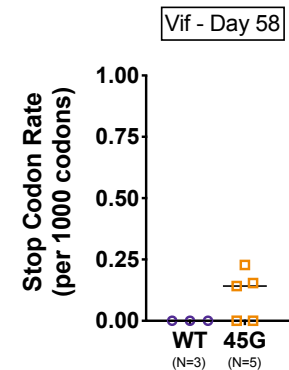



**Supplemental Table 1:** Sequencing pipeline and primers for reverse transcription, PCR amplification and Illumina MiSeq Sequencing

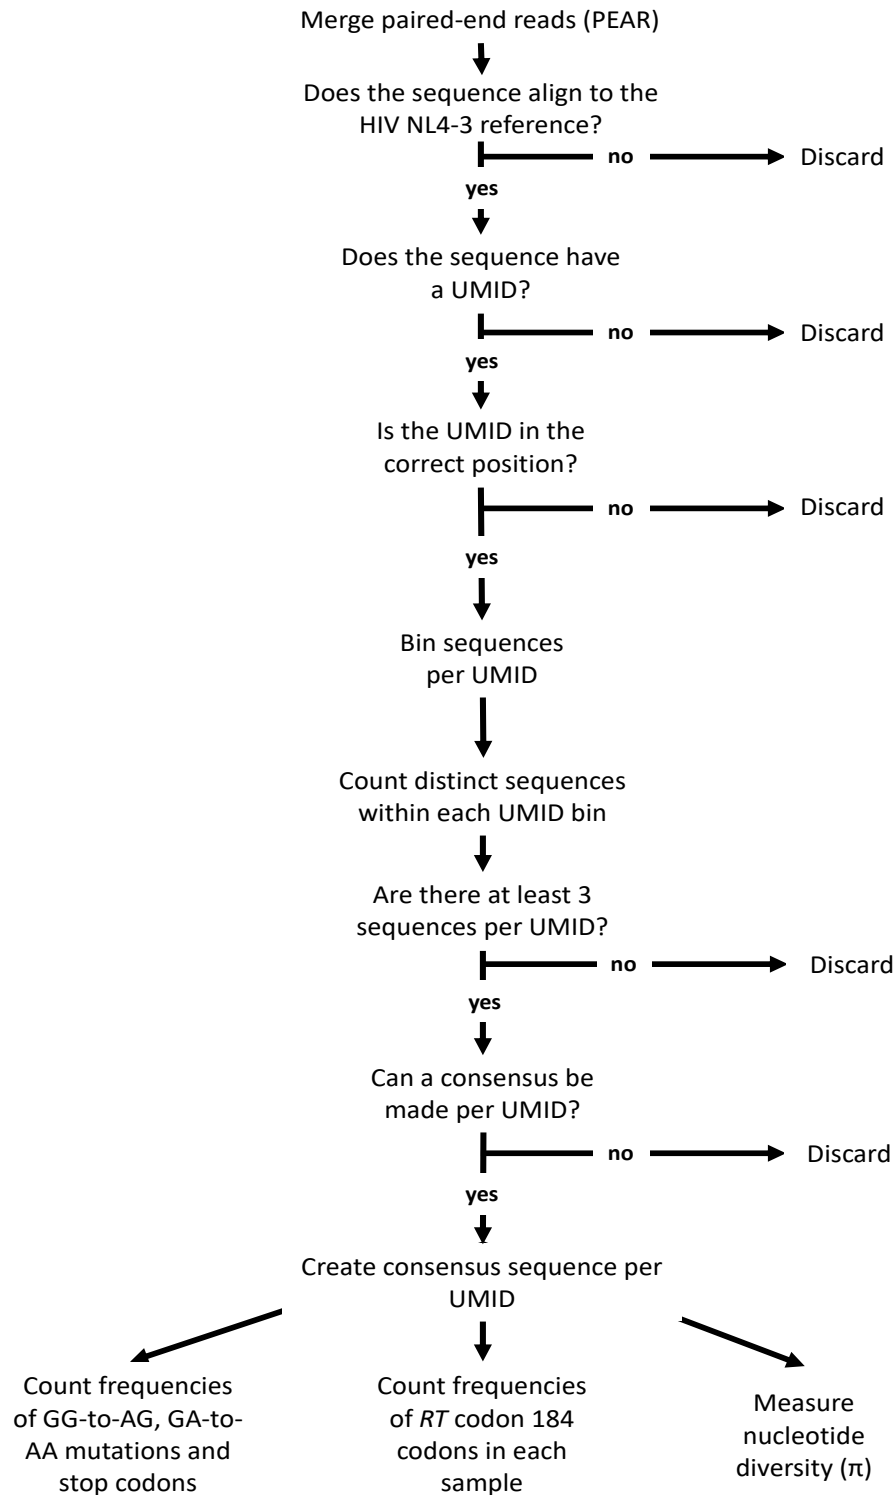

| <b>Reverse Transcription (cDNA synthesis) Primers</b>                |                          |                                                               |
|----------------------------------------------------------------------|--------------------------|---------------------------------------------------------------|
| <b>Primer</b>                                                        | <b>HIV Target</b>        | <b>Sequence (5' to 3') (N = A/T/G/C)</b>                      |
| 4372                                                                 | <i>RT (1st gen)</i>      | TTGCCCAATTCAATTTNNNNNNNNATTTCTGTATGTCATTGACAGTC               |
| 4373                                                                 | <i>Vif</i>               | TAATACGACTCACTATAGGGNNNNNNNNATTTCTTATAGCAGATTCTGA             |
| 4633                                                                 | <i>RT (2nd gen)</i>      | TTGCCCAATTCAATTTNNNNNNNNATTTCTGTATGTCATTGACAGTC               |
|                                                                      |                          |                                                               |
| <b>First Round PCR Primers</b>                                       |                          |                                                               |
| <b>Primer</b>                                                        | <b>HIV Target</b>        | <b>Sequence (5' to 3') (R = A/G)</b>                          |
| 1922                                                                 | <i>RT (For)</i>          | ATAATACTRCATTTACCATAC                                         |
| 1923                                                                 | <i>RT (Rev)</i>          | CTGACTTGCCCAATTCAATT                                          |
| 2402                                                                 | <i>Vif (For)</i>         | GTGACATAAAAGTAGTGCCA                                          |
| 2401                                                                 | <i>RT/Vif (T7) (Rev)</i> | TAATACGACTCACTATAGGG                                          |
|                                                                      |                          |                                                               |
| <b>Second Round PCR Primers (Forward Only)</b>                       |                          |                                                               |
| <b>Primer</b>                                                        | <b>HIV Target</b>        | <b>Sequence (5' to 3')</b>                                    |
| 1690                                                                 | <i>RT</i>                | AATGATACGGCGACCACCGAGATCTACACTCTTTCGGCCTTTTGTAGAAAACAAAATC    |
| 2403                                                                 | <i>Vif</i>               | AATGATACGGCGACCACCGAGATCTACACTCTTTCGACACCATATGTATATTTCAA      |
|                                                                      |                          |                                                               |
| <b>Second Round PCR Primers (Reverse with MiSeq Barcodes) (N=74)</b> |                          |                                                               |
| <b>Primer</b>                                                        | <b>HIV Target</b>        | <b>Sequence (5' to 3')</b>                                    |
| 2129                                                                 | <i>RT</i>                | CAAGCAGAAGACGGCATAACGAGATCGTGATGTGACTGGAGTCTGACTTGCCCAATTCAAT |
| 2130                                                                 | <i>RT</i>                | CAAGCAGAAGACGGCATAACGAGATACATCGGTGACTGGAGTCTGACTTGCCCAATTCAAT |
| 2131                                                                 | <i>RT</i>                | CAAGCAGAAGACGGCATAACGAGATGCCTAAGTACTGGAGTCTGACTTGCCCAATTCAAT  |
| 2132                                                                 | <i>RT</i>                | CAAGCAGAAGACGGCATAACGAGATTGGTCACTGACTGGAGTCTGACTTGCCCAATTCAAT |
| 2133                                                                 | <i>RT</i>                | CAAGCAGAAGACGGCATAACGAGATCACTGTGTGACTGGAGTCTGACTTGCCCAATTCAAT |
| 2134                                                                 | <i>RT</i>                | CAAGCAGAAGACGGCATAACGAGATATTGGCGTGACTGGAGTCTGACTTGCCCAATTCAAT |
| 2135                                                                 | <i>RT</i>                | CAAGCAGAAGACGGCATAACGAGATGATCTGGTGACTGGAGTCTGACTTGCCCAATTCAAT |
| 2136                                                                 | <i>RT</i>                | CAAGCAGAAGACGGCATAACGAGATTCAAGTGTGACTGGAGTCTGACTTGCCCAATTCAAT |
| 2137                                                                 | <i>RT</i>                | CAAGCAGAAGACGGCATAACGAGATCTGATCGTGACTGGAGTCTGACTTGCCCAATTCAAT |
| 2138                                                                 | <i>RT</i>                | CAAGCAGAAGACGGCATAACGAGATAAGCTAGTGACTGGAGTCTGACTTGCCCAATTCAAT |
| 2139                                                                 | <i>RT</i>                | CAAGCAGAAGACGGCATAACGAGATGTAGCCGTGACTGGAGTCTGACTTGCCCAATTCAAT |
| 2140                                                                 | <i>RT</i>                | CAAGCAGAAGACGGCATAACGAGATTCAAGGTGACTGGAGTCTGACTTGCCCAATTCAAT  |
| 2141                                                                 | <i>RT</i>                | CAAGCAGAAGACGGCATAACGAGATTTGACTGTGACTGGAGTCTGACTTGCCCAATTCAAT |
| 2142                                                                 | <i>RT</i>                | CAAGCAGAAGACGGCATAACGAGATGGAAGTGTGACTGGAGTCTGACTTGCCCAATTCAAT |
| 2143                                                                 | <i>RT</i>                | CAAGCAGAAGACGGCATAACGAGATTGACATGTGACTGGAGTCTGACTTGCCCAATTCAAT |
| 2144                                                                 | <i>RT</i>                | CAAGCAGAAGACGGCATAACGAGATGGACGGGTGACTGGAGTCTGACTTGCCCAATTCAAT |
| 2145                                                                 | <i>RT</i>                | CAAGCAGAAGACGGCATAACGAGATCTCTACGTGACTGGAGTCTGACTTGCCCAATTCAAT |
| 2146                                                                 | <i>RT</i>                | CAAGCAGAAGACGGCATAACGAGATGCGGACGTGACTGGAGTCTGACTTGCCCAATTCAAT |
| 2147                                                                 | <i>RT</i>                | CAAGCAGAAGACGGCATAACGAGATTTTACGTGACTGGAGTCTGACTTGCCCAATTCAAT  |
| 2148                                                                 | <i>RT</i>                | CAAGCAGAAGACGGCATAACGAGATGGCCACGTGACTGGAGTCTGACTTGCCCAATTCAAT |
| 2149                                                                 | <i>RT</i>                | CAAGCAGAAGACGGCATAACGAGATCGAAACGTGACTGGAGTCTGACTTGCCCAATTCAAT |
| 2150                                                                 | <i>RT</i>                | CAAGCAGAAGACGGCATAACGAGATCGTACGGTGACTGGAGTCTGACTTGCCCAATTCAAT |
| 2151                                                                 | <i>RT</i>                | CAAGCAGAAGACGGCATAACGAGATCCACTCGTGACTGGAGTCTGACTTGCCCAATTCAAT |

|      |    |                                                                |
|------|----|----------------------------------------------------------------|
| 2152 | RT | CAAGCAGAAGACGGCATAACGAGATGCTACCGTGACTGGAGTCTGACTTGCCCAATTCAAT  |
| 2309 | RT | CAAGCAGAAGACGGCATAACGAGATATCAGTGTGACTGGAGTCTGACTTGCCCAATTCAAT  |
| 2310 | RT | CAAGCAGAAGACGGCATAACGAGATGCTCATGTGACTGGAGTCTGACTTGCCCAATTCAAT  |
| 2311 | RT | CAAGCAGAAGACGGCATAACGAGATAGGAATGTGACTGGAGTCTGACTTGCCCAATTCAAT  |
| 2312 | RT | CAAGCAGAAGACGGCATAACGAGATCTTTTGGTGACTGGAGTCTGACTTGCCCAATTCAAT  |
| 2313 | RT | CAAGCAGAAGACGGCATAACGAGATTAGTTGGTGACTGGAGTCTGACTTGCCCAATTCAAT  |
| 2314 | RT | CAAGCAGAAGACGGCATAACGAGATCCGGTGGTGACTGGAGTCTGACTTGCCCAATTCAAT  |
| 2315 | RT | CAAGCAGAAGACGGCATAACGAGATATCGTGGTGACTGGAGTCTGACTTGCCCAATTCAAT  |
| 2316 | RT | CAAGCAGAAGACGGCATAACGAGATAAAATGGTGACTGGAGTCTGACTTGCCCAATTCAAT  |
| 2317 | RT | CAAGCAGAAGACGGCATAACGAGATATCCGGTGACTGGAGTCTGACTTGCCCAATTCAAT   |
| 2318 | RT | CAAGCAGAAGACGGCATAACGAGATGCTGTAGTGACTGGAGTCTGACTTGCCCAATTCAAT  |
| 2319 | RT | CAAGCAGAAGACGGCATAACGAGATGAATGAGTGACTGGAGTCTGACTTGCCCAATTCAAT  |
| 2320 | RT | CAAGCAGAAGACGGCATAACGAGATTCGGGAGTGACTGGAGTCTGACTTGCCCAATTCAAT  |
| 2321 | RT | CAAGCAGAAGACGGCATAACGAGATCTTCGAGTGACTGGAGTCTGACTTGCCCAATTCAAT  |
| 2322 | RT | CAAGCAGAAGACGGCATAACGAGATTGCCGAGTGACTGGAGTCTGACTTGCCCAATTCAAT  |
| 2562 | RT | CAAGCAGAAGACGGCATAACGAGATTGCTTCGTGACTGGAGTCTGACTTGCCCAATTCAAT  |
| 2563 | RT | CAAGCAGAAGACGGCATAACGAGATACGCGTGTGACTGGAGTCTGACTTGCCCAATTCAAT  |
| 2564 | RT | CAAGCAGAAGACGGCATAACGAGATGGGAGCGTGACTGGAGTCTGACTTGCCCAATTCAAT  |
| 2565 | RT | CAAGCAGAAGACGGCATAACGAGATCCGACAGTGACTGGAGTCTGACTTGCCCAATTCAAT  |
| 2566 | RT | CAAGCAGAAGACGGCATAACGAGATAGTGACAGTGACTGGAGTCTGACTTGCCCAATTCAAT |
| 2567 | RT | CAAGCAGAAGACGGCATAACGAGATACCGCTGTGACTGGAGTCTGACTTGCCCAATTCAAT  |
| 2568 | RT | CAAGCAGAAGACGGCATAACGAGATCAAGCAGTGACTGGAGTCTGACTTGCCCAATTCAAT  |
| 2569 | RT | CAAGCAGAAGACGGCATAACGAGATTAGCGCGTGACTGGAGTCTGACTTGCCCAATTCAAT  |
| 2570 | RT | CAAGCAGAAGACGGCATAACGAGATTACCCTGTGACTGGAGTCTGACTTGCCCAATTCAAT  |
| 2571 | RT | CAAGCAGAAGACGGCATAACGAGATAAAATACGTGACTGGAGTCTGACTTGCCCAATTCAAT |
| 2572 | RT | CAAGCAGAAGACGGCATAACGAGATCTATCTGTGACTGGAGTCTGACTTGCCCAATTCAAT  |
| 2573 | RT | CAAGCAGAAGACGGCATAACGAGATTTATGCGTGACTGGAGTCTGACTTGCCCAATTCAAT  |
| 4444 | RT | CAAGCAGAAGACGGCATAACGAGATACATATGTGACTGGAGTCTGACTTGCCCAATTCAAT  |
| 4445 | RT | CAAGCAGAAGACGGCATAACGAGATACGTCTGTGACTGGAGTCTGACTTGCCCAATTCAAT  |
| 4446 | RT | CAAGCAGAAGACGGCATAACGAGATACTAGCGTGACTGGAGTCTGACTTGCCCAATTCAAT  |
| 4447 | RT | CAAGCAGAAGACGGCATAACGAGATACTATAGTGACTGGAGTCTGACTTGCCCAATTCAAT  |
| 4448 | RT | CAAGCAGAAGACGGCATAACGAGATAGTCTAGTGACTGGAGTCTGACTTGCCCAATTCAAT  |
| 4449 | RT | CAAGCAGAAGACGGCATAACGAGATATTGAGGTGACTGGAGTCTGACTTGCCCAATTCAAT  |
| 4450 | RT | CAAGCAGAAGACGGCATAACGAGATATATCAGTGACTGGAGTCTGACTTGCCCAATTCAAT  |
| 4451 | RT | CAAGCAGAAGACGGCATAACGAGATATGATTGTGACTGGAGTCTGACTTGCCCAATTCAAT  |
| 4452 | RT | CAAGCAGAAGACGGCATAACGAGATATGCTGGTGACTGGAGTCTGACTTGCCCAATTCAAT  |
| 4453 | RT | CAAGCAGAAGACGGCATAACGAGATCACGCAAGTGACTGGAGTCTGACTTGCCCAATTCAAT |
| 4454 | RT | CAAGCAGAAGACGGCATAACGAGATCATCAGGTGACTGGAGTCTGACTTGCCCAATTCAAT  |
| 4455 | RT | CAAGCAGAAGACGGCATAACGAGATCGCAGTGTGACTGGAGTCTGACTTGCCCAATTCAAT  |
| 4456 | RT | CAAGCAGAAGACGGCATAACGAGATCATAGCGTGACTGGAGTCTGACTTGCCCAATTCAAT  |
| 4457 | RT | CAAGCAGAAGACGGCATAACGAGATCTAGTAGTGACTGGAGTCTGACTTGCCCAATTCAAT  |
| 4458 | RT | CAAGCAGAAGACGGCATAACGAGATGACACAGTGACTGGAGTCTGACTTGCCCAATTCAAT  |
| 4459 | RT | CAAGCAGAAGACGGCATAACGAGATGTCTACGTGACTGGAGTCTGACTTGCCCAATTCAAT  |

| 4460                                                                 | RT          | CAAGCAGAAGACGGCATAACGAGATGAGATCGTGACTGGAGTCTGACTTGCCCAATTCAAT |
|----------------------------------------------------------------------|-------------|---------------------------------------------------------------|
| 4461                                                                 | RT          | CAAGCAGAAGACGGCATAACGAGATGCACGTGTGACTGGAGTCTGACTTGCCCAATTCAAT |
| 4462                                                                 | RT          | CAAGCAGAAGACGGCATAACGAGATTGATCAGTGACTGGAGTCTGACTTGCCCAATTCAAT |
| 4463                                                                 | RT          | CAAGCAGAAGACGGCATAACGAGATTACTCGTGACTGGAGTCTGACTTGCCCAATTCAAT  |
| 4464                                                                 | RT          | CAAGCAGAAGACGGCATAACGAGATTCGCTCGTGACTGGAGTCTGACTTGCCCAATTCAAT |
| 4465                                                                 | RT          | CAAGCAGAAGACGGCATAACGAGATTCTCGTGTGACTGGAGTCTGACTTGCCCAATTCAAT |
| 4466                                                                 | RT          | CAAGCAGAAGACGGCATAACGAGATTGCGATGTGACTGGAGTCTGACTTGCCCAATTCAAT |
|                                                                      |             |                                                               |
| <b>Second Round PCR Primers (Reverse with MiSeq Barcodes) (N=80)</b> |             |                                                               |
| Primer                                                               | HIV Target  | Sequence (5' to 3')                                           |
| 4634                                                                 | RT/Vif (T7) | CAAGCAGAAGACGGCATAACGAGATCGTGATGTGACTGGAGTAATACGACTCACTATAGGG |
| 4635                                                                 | RT/Vif (T7) | CAAGCAGAAGACGGCATAACGAGATACATCGGTGACTGGAGTAATACGACTCACTATAGGG |
| 4636                                                                 | RT/Vif (T7) | CAAGCAGAAGACGGCATAACGAGATGCCTAAGTGACTGGAGTAATACGACTCACTATAGGG |
| 4637                                                                 | RT/Vif (T7) | CAAGCAGAAGACGGCATAACGAGATTGGTCACTGACTGGAGTAATACGACTCACTATAGGG |
| 4638                                                                 | RT/Vif (T7) | CAAGCAGAAGACGGCATAACGAGATCACTGTGTGACTGGAGTAATACGACTCACTATAGGG |
| 4639                                                                 | RT/Vif (T7) | CAAGCAGAAGACGGCATAACGAGATATTGGCGTGACTGGAGTAATACGACTCACTATAGGG |
| 4640                                                                 | RT/Vif (T7) | CAAGCAGAAGACGGCATAACGAGATGATCTGGTGACTGGAGTAATACGACTCACTATAGGG |
| 4641                                                                 | RT/Vif (T7) | CAAGCAGAAGACGGCATAACGAGATTCAGTGTGACTGGAGTAATACGACTCACTATAGGG  |
| 4642                                                                 | RT/Vif (T7) | CAAGCAGAAGACGGCATAACGAGATCTGATCGTGACTGGAGTAATACGACTCACTATAGGG |
| 4643                                                                 | RT/Vif (T7) | CAAGCAGAAGACGGCATAACGAGATAAGCTAGTGACTGGAGTAATACGACTCACTATAGGG |
| 4644                                                                 | RT/Vif (T7) | CAAGCAGAAGACGGCATAACGAGATGTAGCCGTGACTGGAGTAATACGACTCACTATAGGG |
| 4645                                                                 | RT/Vif (T7) | CAAGCAGAAGACGGCATAACGAGATTACAAGGTGACTGGAGTAATACGACTCACTATAGGG |
| 4646                                                                 | RT/Vif (T7) | CAAGCAGAAGACGGCATAACGAGATTTGACTGTGACTGGAGTAATACGACTCACTATAGGG |
| 4647                                                                 | RT/Vif (T7) | CAAGCAGAAGACGGCATAACGAGATGGAAGTGTGACTGGAGTAATACGACTCACTATAGGG |
| 4648                                                                 | RT/Vif (T7) | CAAGCAGAAGACGGCATAACGAGATTGACATGTGACTGGAGTAATACGACTCACTATAGGG |
| 4649                                                                 | RT/Vif (T7) | CAAGCAGAAGACGGCATAACGAGATGGACGGGTGACTGGAGTAATACGACTCACTATAGGG |
| 4650                                                                 | RT/Vif (T7) | CAAGCAGAAGACGGCATAACGAGATCTCTACGTGACTGGAGTAATACGACTCACTATAGGG |
| 4651                                                                 | RT/Vif (T7) | CAAGCAGAAGACGGCATAACGAGATGCGGACGTGACTGGAGTAATACGACTCACTATAGGG |
| 4652                                                                 | RT/Vif (T7) | CAAGCAGAAGACGGCATAACGAGATTTTACGTGACTGGAGTAATACGACTCACTATAGGG  |
| 4653                                                                 | RT/Vif (T7) | CAAGCAGAAGACGGCATAACGAGATGGCCACGTGACTGGAGTAATACGACTCACTATAGGG |
| 4654                                                                 | RT/Vif (T7) | CAAGCAGAAGACGGCATAACGAGATCGAAACGTGACTGGAGTAATACGACTCACTATAGGG |
| 4655                                                                 | RT/Vif (T7) | CAAGCAGAAGACGGCATAACGAGATCGTACGGTGACTGGAGTAATACGACTCACTATAGGG |
| 4656                                                                 | RT/Vif (T7) | CAAGCAGAAGACGGCATAACGAGATCCACTCGTGACTGGAGTAATACGACTCACTATAGGG |
| 4657                                                                 | RT/Vif (T7) | CAAGCAGAAGACGGCATAACGAGATGCTACCGTGACTGGAGTAATACGACTCACTATAGGG |
| 4658                                                                 | RT/Vif (T7) | CAAGCAGAAGACGGCATAACGAGATATCAGTGTGACTGGAGTAATACGACTCACTATAGGG |
| 4659                                                                 | RT/Vif (T7) | CAAGCAGAAGACGGCATAACGAGATGCTCATGTGACTGGAGTAATACGACTCACTATAGGG |
| 4660                                                                 | RT/Vif (T7) | CAAGCAGAAGACGGCATAACGAGATAGGAATGTGACTGGAGTAATACGACTCACTATAGGG |
| 4661                                                                 | RT/Vif (T7) | CAAGCAGAAGACGGCATAACGAGATCTTTGGTGACTGGAGTAATACGACTCACTATAGGG  |
| 4662                                                                 | RT/Vif (T7) | CAAGCAGAAGACGGCATAACGAGATTAGTTGGTGACTGGAGTAATACGACTCACTATAGGG |
| 4663                                                                 | RT/Vif (T7) | CAAGCAGAAGACGGCATAACGAGATCCGGTGGTGACTGGAGTAATACGACTCACTATAGGG |
| 4664                                                                 | RT/Vif (T7) | CAAGCAGAAGACGGCATAACGAGATATCGTGGTGACTGGAGTAATACGACTCACTATAGGG |
| 4665                                                                 | RT/Vif (T7) | CAAGCAGAAGACGGCATAACGAGATAAAATGGTGACTGGAGTAATACGACTCACTATAGGG |
| 4666                                                                 | RT/Vif (T7) | CAAGCAGAAGACGGCATAACGAGATATCCGGTGACTGGAGTAATACGACTCACTATAGGG  |

|      |                    |                                                                |
|------|--------------------|----------------------------------------------------------------|
| 4667 | <i>RT/Vif (T7)</i> | CAAGCAGAAGACGGCATAACGAGATGCTGTAGTGACTGGAGTAATACGACTCACTATAGGG  |
| 4668 | <i>RT/Vif (T7)</i> | CAAGCAGAAGACGGCATAACGAGATGAATGAGTGACTGGAGTAATACGACTCACTATAGGG  |
| 4669 | <i>RT/Vif (T7)</i> | CAAGCAGAAGACGGCATAACGAGATTCGGGAGTGACTGGAGTAATACGACTCACTATAGGG  |
| 4670 | <i>RT/Vif (T7)</i> | CAAGCAGAAGACGGCATAACGAGATCTTCGAGTGACTGGAGTAATACGACTCACTATAGGG  |
| 4671 | <i>RT/Vif (T7)</i> | CAAGCAGAAGACGGCATAACGAGATTGCTTCGTGACTGGAGTAATACGACTCACTATAGGG  |
| 4672 | <i>RT/Vif (T7)</i> | CAAGCAGAAGACGGCATAACGAGATACGCGTGTGACTGGAGTAATACGACTCACTATAGGG  |
| 4673 | <i>RT/Vif (T7)</i> | CAAGCAGAAGACGGCATAACGAGATGGGAGCGTGACTGGAGTAATACGACTCACTATAGGG  |
| 4674 | <i>RT/Vif (T7)</i> | CAAGCAGAAGACGGCATAACGAGATCCGACAGTGACTGGAGTAATACGACTCACTATAGGG  |
| 4675 | <i>RT/Vif (T7)</i> | CAAGCAGAAGACGGCATAACGAGATAGTGCAGTGACTGGAGTAATACGACTCACTATAGGG  |
| 4676 | <i>RT/Vif (T7)</i> | CAAGCAGAAGACGGCATAACGAGATACCGCTGTGACTGGAGTAATACGACTCACTATAGGG  |
| 4677 | <i>RT/Vif (T7)</i> | CAAGCAGAAGACGGCATAACGAGATTAGCGCGTGACTGGAGTAATACGACTCACTATAGGG  |
| 4678 | <i>RT/Vif (T7)</i> | CAAGCAGAAGACGGCATAACGAGATAAATACGTGACTGGAGTAATACGACTCACTATAGGG  |
| 4679 | <i>RT/Vif (T7)</i> | CAAGCAGAAGACGGCATAACGAGATCTATCTGTGACTGGAGTAATACGACTCACTATAGGG  |
| 4680 | <i>RT/Vif (T7)</i> | CAAGCAGAAGACGGCATAACGAGATTTATGCGTGACTGGAGTAATACGACTCACTATAGGG  |
| 4681 | <i>RT/Vif (T7)</i> | CAAGCAGAAGACGGCATAACGAGATACATATGTGACTGGAGTAATACGACTCACTATAGGG  |
| 4682 | <i>RT/Vif (T7)</i> | CAAGCAGAAGACGGCATAACGAGATACGTCTGTGACTGGAGTAATACGACTCACTATAGGG  |
| 4683 | <i>RT/Vif (T7)</i> | CAAGCAGAAGACGGCATAACGAGATACTAGCGTGACTGGAGTAATACGACTCACTATAGGG  |
| 4684 | <i>RT/Vif (T7)</i> | CAAGCAGAAGACGGCATAACGAGATACTATAGTGACTGGAGTAATACGACTCACTATAGGG  |
| 4685 | <i>RT/Vif (T7)</i> | CAAGCAGAAGACGGCATAACGAGATAGTCTAGTGACTGGAGTAATACGACTCACTATAGGG  |
| 4686 | <i>RT/Vif (T7)</i> | CAAGCAGAAGACGGCATAACGAGATATTGAGGTGACTGGAGTAATACGACTCACTATAGGG  |
| 4687 | <i>RT/Vif (T7)</i> | CAAGCAGAAGACGGCATAACGAGATATATCAGTGACTGGAGTAATACGACTCACTATAGGG  |
| 4688 | <i>RT/Vif (T7)</i> | CAAGCAGAAGACGGCATAACGAGATATGATTGTGACTGGAGTAATACGACTCACTATAGGG  |
| 4689 | <i>RT/Vif (T7)</i> | CAAGCAGAAGACGGCATAACGAGATATGCTGGTGACTGGAGTAATACGACTCACTATAGGG  |
| 4690 | <i>RT/Vif (T7)</i> | CAAGCAGAAGACGGCATAACGAGATCACGCACTGACTGGAGTAATACGACTCACTATAGGG  |
| 4691 | <i>RT/Vif (T7)</i> | CAAGCAGAAGACGGCATAACGAGATCATCAGGTGACTGGAGTAATACGACTCACTATAGGG  |
| 4692 | <i>RT/Vif (T7)</i> | CAAGCAGAAGACGGCATAACGAGATCGCAGTGTGACTGGAGTAATACGACTCACTATAGGG  |
| 4693 | <i>RT/Vif (T7)</i> | CAAGCAGAAGACGGCATAACGAGATCATAGCGTGACTGGAGTAATACGACTCACTATAGGG  |
| 4694 | <i>RT/Vif (T7)</i> | CAAGCAGAAGACGGCATAACGAGATCTAGTAGTGACTGGAGTAATACGACTCACTATAGGG  |
| 4695 | <i>RT/Vif (T7)</i> | CAAGCAGAAGACGGCATAACGAGATGACACAGTGACTGGAGTAATACGACTCACTATAGGG  |
| 4696 | <i>RT/Vif (T7)</i> | CAAGCAGAAGACGGCATAACGAGATGTCTACGTGACTGGAGTAATACGACTCACTATAGGG  |
| 4697 | <i>RT/Vif (T7)</i> | CAAGCAGAAGACGGCATAACGAGATGAGATCGTGACTGGAGTAATACGACTCACTATAGGG  |
| 4698 | <i>RT/Vif (T7)</i> | CAAGCAGAAGACGGCATAACGAGATGCACGTGTGACTGGAGTAATACGACTCACTATAGGG  |
| 4699 | <i>RT/Vif (T7)</i> | CAAGCAGAAGACGGCATAACGAGATTGATCAGTGACTGGAGTAATACGACTCACTATAGGG  |
| 4700 | <i>RT/Vif (T7)</i> | CAAGCAGAAGACGGCATAACGAGATTATCTCGTGACTGGAGTAATACGACTCACTATAGGG  |
| 4701 | <i>RT/Vif (T7)</i> | CAAGCAGAAGACGGCATAACGAGATTCGCTCGTGACTGGAGTAATACGACTCACTATAGGG  |
| 4702 | <i>RT/Vif (T7)</i> | CAAGCAGAAGACGGCATAACGAGATTCTCGTGTGACTGGAGTAATACGACTCACTATAGGG  |
| 4703 | <i>RT/Vif (T7)</i> | CAAGCAGAAGACGGCATAACGAGATTGCGATGTGACTGGAGTAATACGACTCACTATAGGG  |
| 4704 | <i>RT/Vif (T7)</i> | CAAGCAGAAGACGGCATAACGAGATTGCCGAGTGACTGGAGTAATACGACTCACTATAGGG  |
| 4705 | <i>RT/Vif (T7)</i> | CAAGCAGAAGACGGCATAACGAGATTACCTGTGACTGGAGTAATACGACTCACTATAGGG   |
| 4722 | <i>RT/Vif (T7)</i> | CAAGCAGAAGACGGCATAACGAGATGTTACAGTGACTGGAGTAATACGACTCACTATAGGG  |
| 4723 | <i>RT/Vif (T7)</i> | CAAGCAGAAGACGGCATAACGAGATGGATTCTGTGACTGGAGTAATACGACTCACTATAGGG |
| 4724 | <i>RT/Vif (T7)</i> | CAAGCAGAAGACGGCATAACGAGATACAGATGTGACTGGAGTAATACGACTCACTATAGGG  |
| 4725 | <i>RT/Vif (T7)</i> | CAAGCAGAAGACGGCATAACGAGATTATTGCGTGACTGGAGTAATACGACTCACTATAGGG  |

| 4726                            | <i>RT/Vif (T7)</i>       | CAAGCAGAAGACGGCATAACGAGATGTCTATGTGACTGGAGTAATACGACTCACTATAGGG |
|---------------------------------|--------------------------|---------------------------------------------------------------|
| 4727                            | <i>RT/Vif (T7)</i>       | CAAGCAGAAGACGGCATAACGAGATTCTCAGGTGACTGGAGTAATACGACTCACTATAGGG |
| 4728                            | <i>RT/Vif (T7)</i>       | CAAGCAGAAGACGGCATAACGAGATATAGAGGTGACTGGAGTAATACGACTCACTATAGGG |
| 4729                            | <i>RT/Vif (T7)</i>       | CAAGCAGAAGACGGCATAACGAGATCTACAAGTGACTGGAGTAATACGACTCACTATAGGG |
| <b>MiSeq Sequencing Primers</b> |                          |                                                               |
| <b>Primer</b>                   | <b>Target</b>            | <b>Sequence (5' to 3')</b>                                    |
| 1692                            | <i>RT For</i>            | ACACTCTTTTCGGCCTTTTAGAAAACAAAATC                              |
| 3890                            | <i>RT Index</i>          | ATTGAATTGGGCAAGTCAGACTCCAGTCAC                                |
| 3889                            | <i>RT Rev</i>            | GTGACTGGAGTCTGACTTGCCCAATTCAAT                                |
| 4577                            | <i>RT/Vif (T7) Index</i> | CCCTATAGTGAGTCGTATTACTCCAGTCAC                                |
| 4578                            | <i>RT/Vif (T7) Rev</i>   | GTGACTGGAGTAATACGACTCACTATAGGG                                |
| 4580                            | <i>Vif For</i>           | CGAGATCTACACTCTTTCGACACCATATGTATATTC                          |
